1 **Cyclin Dependent Kinase 5 (CDK5) Regulates the Circadian Clock**

2

3 Andrea Brenna, Iwona Olejniczak, Rohit Chavan, Jürgen A. Ripperger, Sonja Langmesser,

4 Elisabetta Cameroni, Zehan Hu, Claudio De Virgilio, Jörn Dengjel, and Urs Albrecht\*

5

6 *Department of Biology, University of Fribourg, 1700 Fribourg, Switzerland*

7

8

9

10

11

12 \*Corresponding author: [urs.albrecht@unifr.ch](mailto:urs.albrecht@unifr.ch)

13

14

15

16

17 Keywords: Period 2, Cryptochrome 1, phosphorylation, nuclear import, proteasome

18

19

20

21

22

23

24 **Abstract**

25 Circadian oscillations emerge from transcriptional and post-translational feedback loops. An  
26 important step in generating rhythmicity is the translocation of clock components into the  
27 nucleus, which is regulated in many cases by kinases. In mammals, the kinase promoting the  
28 nuclear import of the key clock component Period 2 (PER2) is unknown. Here we show that  
29 the cyclin-dependent kinase 5 (CDK5) regulates the mammalian circadian clock involving  
30 phosphorylation of PER2. Knock-down of *Cdk5* in the suprachiasmatic nuclei (SCN), the main  
31 coordinator site of the mammalian circadian system, shortened the free-running period in mice.  
32 CDK5 phosphorylated PER2 at serine residue 394 (S394) in a diurnal fashion. This  
33 phosphorylation facilitated interaction with Cryptochrome 1 (CRY1) and nuclear entry of the  
34 PER2-CRY1 complex. Taken together, we found that CDK5 drives nuclear entry of PER2,  
35 which is critical for establishing an adequate circadian period of the molecular circadian cycle.  
36 Therefore, CDK5 is critically involved in the regulation of the circadian clock and may  
37 represent a link to various diseases affected by the circadian clock.

38

39

## 40 **Introduction**

41 The circadian clock, prevalent in most organisms, is an evolutionary adaptation to the daily  
42 light-dark cycle generated by the sun and the earth's rotation around its own axis (Rosbash,  
43 2009). This clock allows organisms to organize physiology and behavior over the 24 h time  
44 scale in order to adapt and thus optimize, body function to predictably recurring daily events.  
45 Malfunctioning or disruption of the circadian clock in humans results in various pathologies  
46 including obesity, cancer, and neurological disorders (Roenneberg & Merrow, 2016). In order  
47 to maintain phase synchronicity with the environmental light-dark cycle, the suprachiasmatic  
48 nuclei (SCN), a bipartite brain structure located in the ventral part of the hypothalamus above  
49 the optic chiasm, receive light information from the retina. The SCN convert this information  
50 into humoral and neuronal signals to set the phase of all circadian oscillators in the body  
51 (Dibner, Schibler, & Albrecht, 2010).

52 In order to measure the length of one day, organisms have developed cell-based  
53 molecular mechanisms relying on feedback loops involving a set of clock genes. The existence  
54 of such loops was suggested by the analysis of *Drosophila* having various mutations in their  
55 *period (per)* gene (Hardin, Hall, & Rosbash, 1990). Further studies completed the picture of  
56 intertwined transcriptional feedback loops at the heart of the *Drosophila* circadian oscillator  
57 (Darlington et al., 1998). Every day, *per* accumulates to a certain concentration upon which it  
58 enters into the nucleus together with *timeless (tim)*. This protein complex inhibits  
59 transcriptional activation mediated by dClock and cycle acting on the expression of *per* and  
60 *tim*. After the degradation of the inhibitor complex, the repression is relieved and a new  
61 circadian cycle starts.

62 To fine-tune the period of the circadian oscillator, kinases regulate the accumulation and  
63 nuclear entry of *per* and *tim*. The kinase double-time (*dbt*) phosphorylates *per* to destabilize it  
64 and to prevent its transport into the nucleus (Kloss et al., 1998; Price et al., 1998). On the other

65 hand, the kinase shaggy (shg) phosphorylates tim to stabilize the heterodimer and to promote  
66 its nuclear translocation (Martinek, Inonog, Manoukian, & Young, 2001). Many other kinases  
67 and phosphatases are necessary to complete the *Drosophila* circadian cycle and to adjust its  
68 phase to the external light-dark rhythm (Garbe et al., 2013).

69 The circadian oscillator of mammals is arranged very similarly to the one of *Drosophila*,  
70 with some modifications (Dibner et al., 2010; Takahashi, 2017). For instance, the function of  
71 *Drosophila* tim to escort per into the nucleus was replaced by the Cryptochromes (Cry) in the  
72 mammalian system (van der Horst et al., 1999). Furthermore, the first mutation to affect the  
73 mammalian circadian oscillator, *Tau*, was later mapped to Casein kinase I $\epsilon$  (CK1 $\epsilon$ ), which is  
74 the *Drosophila* dbt orthologue (Lowrey et al., 2000). One of the sites phosphorylated by  
75 CK1 $\epsilon$  within human PER2 is mutated in the Familial Advanced Sleep Phase Syndrome  
76 (FASPS) (Toh et al., 2001). This mutation and also the *Tau* mutation were subsequently  
77 introduced into the mouse genome to prove their functional relevance (Meng et al., 2008; Y.  
78 Xu et al., 2007). However, a kinase similar to the function of shg in *Drosophila*, which  
79 stabilizes and promotes the import of PER proteins into the nucleus of mammals (Hirano,  
80 Braas, Fu, & Ptacek, 2017), has not been identified. Interestingly, PER2 contains over 20  
81 potential phosphorylation sites (Vanselow et al., 2006), indicating that mammalian PER and  
82 specifically PER2 are highly regulated at the post-translational level. This degree of  
83 phosphorylation is probably contributing to the precise rhythmicity of PER2, which stands out  
84 as a crucial feature of the core clock (Chong, Ptacek, & Fu, 2012).

85 Among the plethora of kinases identified that phosphorylate mammalian clock proteins,  
86 cyclin dependent kinase 5 (CDK5) was found to target CLOCK (Kwak et al., 2013). CDK5 is  
87 a proline-directed serine-threonine kinase belonging to the Cdc2/Cdk1 family that is controlled  
88 by the neural specific activators p35, p39 (Tang et al., 1995; Tsai, Delalle, Caviness, Chae, &  
89 Harlow, 1994), and cyclin I (Brinkkoetter et al., 2009). CDK5 regulates various neuronal

90 processes such as neurogenesis, neuronal migration, and axon guidance (Kawauchi, 2014).  
91 Outside of the nervous system CDK5 regulates vesicular transport, apoptosis, cell adhesion,  
92 and migration in many cell types (Contreras-Vallejos, Utreras, & Gonzalez-Billault, 2012). It  
93 has been proposed that CDK5 modulates the brain reward system (Benavides et al., 2007; Bibb  
94 et al., 2001) and that it is consequently linked to psychiatric diseases (Engmann et al., 2011;  
95 Zhu et al., 2012). Interestingly, the clock components PER2 and CLOCK have been associated  
96 with the same processes (Abarca, Albrecht, & Spanagel, 2002; Hampp et al., 2008; Roybal et  
97 al., 2007), leading us to speculate that an interaction between the circadian clock and CDK5  
98 may exist. However, it is unknown whether CDK5 plays an important role in the central  
99 oscillator of the circadian clock.

100 In this study, we wanted to identify proteins promoting the nuclear transport of PER2  
101 with focus on kinase(s) acting similarly to shg. Using a genetic synthetic lethal dosage screen  
102 in yeast, we observed a genetic interaction between *Per2* and *PHO85*, which encodes a cyclin-  
103 dependent protein kinase that is orthologous to CDK5 in mammals. Subsequent experiments  
104 in mice demonstrated that silencing of *Cdk5* in the SCN shortened the clock period. Our study  
105 identified CDK5 as a critical protein kinase in the regulation of the circadian clock and in  
106 particular as an important regulator of the crucial clock component PER2.

107

108 **Results**

109

110 **Genetic interaction between *Per2* and CDK5 in yeast and diurnal activity of CDK5.** In

111 order to gain insight into the regulation of PER2 function in mice, we initially tried to identify

112 genes that genetically interact with *Per2* in budding yeast by using a variation of the Synthetic

113 Genetic Array (SGA) method (Tong et al., 2001). To this end, we carried out a synthetic dosage

114 lethality (SDL) screen, which is based on the concept that a high dosage of a given protein (*i.e.*

115 PER2 in this case) may have negligible effect on growth in wild-type cells (as we found to be

116 the case for PER2; Fig. 1A), but may compromise growth in mutants that have defects in

117 pathway components or in functionally related processes (Measday et al., 2005; Sopko et al.,

118 2006). Of note, SDL screens have been instrumental in the past to specifically predict the

119 relationship between protein kinases and their targets (Sharifpoor et al., 2012). Our search in a

120 yeast knockout collection (encompassing 4857 individual deletion strains) for mutants that

121 exhibited significantly reduced growth when combined with increased dosage of PER2 (see

122 Methods for further details) allowed us to isolate 3 mutants, namely *eap1Δ*, *gnd1Δ*, and *pho85Δ*

123 (Fig. 1A). Among these, the strain lacking the cyclin-dependent protein kinase Pho85 was most

124 dramatically compromised for growth in the presence of high doses of PER2. Hence, Pho85

125 antagonizes the growth-inhibitory effect of PER2 in yeast, which indicates that the Pho85-

126 orthologous CDK5 may potentially act upstream of PER2 in mammalian cells.

127 The protein kinase CDK5 is mostly expressed in the brain and has previously been

128 implicated in phosphorylation of mammalian CLOCK (Kwak et al., 2013). However, the

129 functional relevance of CDK5 for the clock mechanism has never been tested. Therefore, we

130 investigated whether CDK5 affected the functioning of the circadian clock. First, we assessed

131 whether CDK5 displayed time of day-dependent expression and activity in the SCN, the master

132 clock of the circadian system. We collected SCN samples every 4 h starting from ZT0 until

133 ZT20 (ZT0 = light on, ZT12 = light off), and performed western blots on total extracts using

134 specific antibodies (Fig. 1B). The immunoblot against CRY1 showed a diurnal profile of this  
135 protein with a peak during the late-night phase, confirming that the mice were entrained  
136 properly to the light-dark cycle. In contrast, the CDK5 accumulation profile seemed to be  
137 unaffected by the time of day (Fig. 1B). Next, we investigated whether CDK5 kinase activity  
138 displayed a diurnal profile. While CDK5 levels did not change significantly over one day (Fig.  
139 1B), we observed that histone-H1, a known CDK5 target (Peterson et al., 2010), was  
140 phosphorylated by this kinase in a time of day-dependent manner, with the highest levels of  
141 CDK5 activity observed at ZT12 to ZT20, i.e. during the dark phase (Fig. 1C). Phosphorylation  
142 of histone-H1 was specifically blocked by roscovitine, a CDK5 inhibitor (Hsu et al., 2013),  
143 whereas LiCl, a Gsk3 $\beta$  inhibitor, did not affect this phosphorylation (Fig. 1D), confirming a  
144 CDK5-specific phosphorylation. Altogether, these data demonstrated that CDK5 kinase  
145 activity (but not protein accumulation) was diurnal in the SCN.

146

147 **CDK5 regulates the circadian clock.** Since CDK5 activity displayed a diurnal profile in the  
148 SCN, we tested whether knock-down of CDK5 in the master clock of the SCN changed  
149 circadian behavior in mice. To this end, we tested various shRNAs against *Cdk5* in NIH 3T3  
150 fibroblast cells (Fig. S1A) and subsequently injected into the SCN region adeno-associated  
151 viral particles containing expression vectors for either a scrambled set of shRNA or a *Cdk5*-  
152 specific shRNA (variant D, Fig. S1A). After recovery from the procedure the animals were  
153 transferred into cages containing a running-wheel in order to assess their activity profiles. The  
154 control animals expressing the scrambled set of shRNA displayed normal activity in the light-  
155 dark (LD) cycle with precise onset of activity at the beginning of the dark phase (ZT12). This  
156 onset of activity was less precise in mice with a *Cdk5* knock-down (shCdk5) but comparable  
157 to animals with a deletion mutation in the clock gene *Per2*, designated as *Per2<sup>Brdm1</sup>* (Fig. 2A,  
158 Fig. S1B). In constant darkness (DD),  $\chi^2$ -periodogram analysis revealed a normal average free-

159 running period for the scramble control mice, whereas for shCdk5 and *Per2<sup>Brdm1</sup>*, the period  
160 was significantly shortened (Fig. 2B). In one case, the shCdk5 animals became arrhythmic  
161 (Fig. 2C), again comparable to *Per2<sup>Brdm1</sup>* mice that eventually became arrhythmic in DD as  
162 well (Zheng et al., 1999). The total wheel-running activity was significantly reduced in shCdk5  
163 and *Per2<sup>Brdm1</sup>* mice under DD as well as under LD conditions when compared with the  
164 scrambled control animals (Fig. S1C). The reduction of activity in the mutants under LD  
165 conditions is confined to the dark phase, but comparable between all three genotypes in the  
166 light phase (Fig. S1D). These results indicate that the period of the clock is affected by the lack  
167 of *Cdk5* expression in the SCN.

168 Interestingly, period in *Per2<sup>Brdm1</sup>* mutant and wild type shCdk5 knocked-down mice  
169 was not significantly different (Fig. 2F). In order to test the contribution of *Cdk5* we knocked  
170 down *Cdk5* in *Per2<sup>Brdm1</sup>* mutant mice. This even further shortened period in *Per2<sup>Brdm1</sup>* mutant  
171 animals compared to scramble control *Per2<sup>Brdm1</sup>* animals (Fig. 2D, E, S2), indicating that Cdk5  
172 may affect period via other factors than *Per2*. Taken together, it appears that CDK5 is a main  
173 regulator of the circadian clock mechanism by targeting PER2.

174 In order to confirm that the different phenotypes were associated with the accumulation  
175 levels of CDK5 in control and *Cdk5*-silenced mice, we performed immunofluorescence assays  
176 on coronal sections of the SCN. Sections were stained with DAPI (blue) in order to label nuclei,  
177 with GFP antibody (green) in order to show cells infected by the virus, and with CDK5  
178 antibody (red) in order to compare protein accumulation between the two strains. Scramble as  
179 well as shCdk5 mice expressed GFP in the SCN, indicating that the two different viruses  
180 infected cells in this brain region (Fig. 3A, S3A,B). The expression of *Cdk5* was efficiently  
181 suppressed in the SCN by the shCdk5 but not by the scrambled shRNA (Fig. 3A, S3A,B),  
182 indicating that the behavioral phenotypes observed are due to efficient knock-down of *Cdk5*.  
183 The *Cdk5* shRNAs was expressed in the SCN (the injection site) and to some extent also dorsal



184 to the SCN but not in distant brain regions (i.e. the piriform cortex) as confirmed by lack of the  
185 GFP signal outside of the targeted region (Fig. 3A).

186 Surprisingly, the phenotypes of shCdk5 and *Per2<sup>Brdm1</sup>* mice showed considerable  
187 similarity, implicating that the levels of PER2 accumulation might be similar in these two  
188 different mouse strains. In order to test whether *Cdk5* knock-down affected PER2, we stained  
189 with DAPI (blue) and immunostained with anti-PER2 (red) SCN sections obtained from  
190 control, shCdk5 and *Per2<sup>Brdm1</sup>* mice perfused at ZT12. PER2 was observed in the SCN of  
191 scramble controls, but was strongly reduced in shCdk5 and almost absent in *Per2<sup>Brdm1</sup>* animals  
192 (Fig. 3B, S3C,D). These data suggested that CDK5 is a main regulator of the core circadian  
193 clock in the SCN and may alter PER2 accumulation and potentially other proteins involved in  
194 clock regulation.

195

196 **CDK5 interacts with PER2 protein in a temporal fashion.** A study in *Drosophila* has shown  
197 that several kinases, including cyclin dependent kinases, phosphorylate specific sites on per to  
198 maintain the circadian period (Garbe et al., 2013). Therefore, we aimed to understand whether  
199 a molecular interaction exists between CDK5 and PER2. We transfected cells with *Per2* and  
200 *Cdk5* expression vectors and tested whether the two proteins co-immunoprecipitated. We  
201 observed that immunoprecipitation with an anti-CDK5 antibody pulled down PER2 protein in  
202 two different cell lines (Fig. 4A, S4A). Similar interactions were observed when cells were  
203 transfected with expression constructs resulting in PER2 and CDK5 proteins fused to short  
204 amino-acid tags of viral protein 5 (V5) and haemaglutinine (HA) fused to them, respectively  
205 (Fig. 4B). Interestingly, interaction between PER2-V5 and CDK5-HA was reduced when  
206 roscovitine, which inhibits interaction of CDK5 with its targets (Hsu et al., 2013), was added  
207 to the cells (Fig. 4B). This suggested that active CDK5 protein interacted better with PER2  
208 than CDK5 in its inhibited form.

209 In order to test whether this interaction could be observed in tissue, we prepared total  
210 brain extracts at ZT12, when kinase activity of CDK5 was high (Fig. 1C). At two different salt  
211 concentrations we could pull-down PER2 and CDK5 using either anti-CDK5 or anti-PER2  
212 antibodies (Fig. S4B). The specificity of the signals was confirmed by using brain extracts from  
213 *Per2*<sup>-/-</sup> mice (Chavan et al., 2016) that completely lack PER2 protein (Fig. 4C). Next, we  
214 wanted to investigate whether the interaction between the two proteins is time of day-  
215 dependent in the SCN. Total extracts of SCN tissue at ZT0, 4, 8, 12, 16 and 20 were prepared  
216 and immunoprecipitation with an anti-CDK5 antibody pulled down PER2 at ZT8, 12, and 16,  
217 with the strongest signals at ZT12 and ZT16 (Fig. 4D). Taken together, these observations  
218 suggested that the interaction between CDK5 and PER2 can occur in brain tissue and that in  
219 the SCN this interaction was time of day-dependent. This observation was confirmed on SCN  
220 tissue sections, where we observed PER2 expression at ZT12 but less at ZT0 with co-  
221 localization of CDK5 restricted to ZT12 (Fig. S4C).

222 Next, we tested in which subcellular compartment the interaction between CDK5 and  
223 PER2 takes place. We prepared nuclear and cytoplasmic extracts from total brain tissue and  
224 performed immunoprecipitation using an anti-CDK5 antibody. PER2 could only be observed  
225 in the cytoplasmic but not the nuclear fraction (Fig. 4E). This was supported by the observation  
226 that the two proteins were co-localized only in the cytoplasm in SCN tissue (Fig. 4F, yellow  
227 color).

228 Furthermore, we evaluated with which part of PER2 the CDK5 protein interacts. We  
229 tested whether deletions in the PAS-domain of PER2, a known domain for protein interactions  
230 (Ponting & Aravind, 1997), influenced CDK5 binding. No significant effect of deletions of the  
231 PAS-A and PAS-B domains on the interaction was observed (Fig. S4D). Next, we generated  
232 expression vectors coding either for the N-terminal (1-576) or the C-terminal part (577-1257)  
233 of PER2 fused to GST (Fig. S4E). The recombinant forms of PER2 and histidine-tagged CDK5

234 were produced in bacteria. A pull-down assay with these proteins showed that the C-terminal  
235 but not the N-terminal half of the PER2 protein was pulled-down by CDK5, suggesting that  
236 CDK5 binds to the C-terminal part of PER2 (Fig. 4G). This does, however, not exclude weak  
237 interactions of the CDK5 protein with the N-terminal half *in vivo*. Taken together, our data  
238 suggest a physical interaction of PER2 and CDK5 in the cytoplasm.

239

240 **CDK5 phosphorylates PER2 at serine 394.** In order to understand whether CDK5  
241 phosphorylates the PER2 protein we overexpressed the N-terminal and C-terminal parts of  
242 PER2 fused to GST in bacteria (Fig. S5A) and performed an *in vitro* kinase assay with the  
243 recombinant proteins. Recombinant CDK5/p35 protein complex along with  $\gamma$ -<sup>32</sup>P labeled ATP  
244 resulted in phosphorylation of the N-terminal part of the PER2 protein with a main signal at  
245 around 120 kD (Fig. 5A, S5B, <sup>32</sup>P panels). Addition of roscovitine abolished phosphorylation  
246 of PER2 whereas LiCl had no effect (Fig. S5C). Interestingly, no phosphorylation of the C-  
247 terminal part of PER2 was observed, only a signal corresponding to the auto-phosphorylation  
248 of CDK5 was detected at around 60 kD (Fig. 5A, <sup>32</sup>P panel).

249 Next, we aimed to identify the phosphorylation site(s) in the N-terminal part of PER2  
250 using the recombinant protein, which was phosphorylated by CDK5/p35 *in vitro*. Mass  
251 spectrometry revealed several phosphorylation sites at serine and threonine residues,  
252 respectively (Supplemental Table S1). One of the serine residues of PER2 was located within  
253 a CDK5 consensus sequence and had the highest probability score for being phosphorylated  
254 (Fig. 5B). The serine residue at position 394 (S394) of PER2 is located at the end of the PAS  
255 domain and within the deletion of the mutated PER2 of *Per2<sup>Brdm1</sup>* mice (Zheng et al., 1999).  
256 This suggested that CDK5/p35 phosphorylates S394 and that this phosphorylation is of  
257 functional relevance. Mutations of this serine to aspartic acid (S394D) or glycine (S394G)  
258 reduced phosphorylation by CDK5/p35 significantly (Fig. 5C), confirming that CDK5/p35

259 phosphorylated S394. Next, we produced a monoclonal antibody against the phosphorylated  
260 serine at 394 of PER2 (P-S394-PER2) (Fig. S5D-F). With this antibody we detected the  
261 phosphorylated N-terminal fragment of PER2 in presence of CDK5/p35 but not when S394  
262 was mutated to glycine (S394G) or when CDK5 was inhibited by roscovitine (Fig. 5D),  
263 confirming S394 phosphorylation by CDK5/p35.

264 In order to determine whether PER2 phosphorylation at S394 is time of day-dependent,  
265 we collected SCN tissue every 4 h. The P-S394-PER2 specific antibody detected highest  
266 phosphorylation at ZT12 with weaker or no phosphorylation at other time points indicating that  
267 S394 is phosphorylated in a time of day-dependent manner (Fig. 5E). Fractionation of wild-  
268 type brain cellular extracts prepared at ZT12 into nuclear and cytoplasmic parts showed  
269 phosphorylated S394 predominantly in the cytoplasm with little or no signal in the nucleus  
270 when labeled with the P-S394-PER2 antibody (Fig. 5F). Total PER2 was observed in both  
271 cellular compartments with higher levels in the nucleus (Fig. 5F). This suggested that  
272 phosphorylation of S394 of PER2 happens predominantly in the cytoplasm and that this  
273 phosphorylation is either removed or occluded when PER2 enters the nucleus.

274

275 **CDK5 affects stability and nuclear localization of PER2.** To evaluate the function of CDK5-  
276 driven PER2 phosphorylation we wanted to determine whether CDK5 affects PER2 stability.  
277 We treated NIH 3T3 cells with roscovitine and DMSO as control and determined endogenous  
278 levels of PER2. We observed that roscovitine treatment of cells reduced PER2 levels,  
279 suggesting that CDK5 can affect protein stability (Fig. 6A). In order to challenge this  
280 observation, we deleted *Cdk5* in NIH 3T3 cells using the CRISPR/Cas9 method (Fig. S6A-C).  
281 We observed that deletion of *Cdk5* led to reduced amounts of PER2 (Fig. 6B), consistent with  
282 the data shown in Figure 6A. These observations support the notion that phosphorylation by  
283 CDK5 affects PER2 abundance. In order to monitor PER2 stability, we knocked down *Cdk5*

284 using the shRNA D (Fig. S1A). We observed that increasing amounts of shCdk5 dampened  
285 PER2 levels proportionally to the decreasing CDK5 levels (Fig. 6C).

286 In order to determine whether CDK5 modulates degradation of PER2, we blocked  
287 protein synthesis using cycloheximide. Under conditions that partially knocked down *Cdk5* (at  
288 a concentration of 2.7  $\mu$ M of shCdk5, Fig. 6C), we measured PER2 and CDK5 protein levels  
289 over 6 h after cycloheximide treatment. We found that degradation of PER2 was faster when  
290 *Cdk5* was knocked down compared with unspecific shRNA treatment (shCdk5  $t_{1/2}$ =4 h, scr  
291  $t_{1/2}$ =11 h) (Fig. 6D), indicating that reduction of *Cdk5* accelerated PER2 degradation. Next, we  
292 investigated whether PER2 degradation involved the proteasome. Cells were treated with  
293 epoxomycin, a proteasome inhibitor, or with the solvent DMSO. In line with our previous  
294 experiments, shCdk5 treatment efficiently knocked down CDK5 and reduced PER2 levels  
295 compared with scrambled shRNA treatment. Addition of epoxomycin, but not DMSO,  
296 significantly increased PER2 levels despite absence of CDK5 (Fig. 6E), indicating that PER2  
297 degradation involved the proteasome. Residual amounts of CDK5 in the cells still may  
298 phosphorylate PER2 and direct it into the nucleus. Therefore, we wanted to see whether PER2  
299 could be detected in nuclear extracts of shCdk5 knocked down cells. In line with our previous  
300 observations we did not detect PER2 in nuclear extract (Fig. 6F), supporting the idea that PER2  
301 needed to be phosphorylated by CDK5 in order to enter the nucleus. Data from  
302 immunofluorescence experiments on SCN sections were in line with this hypothesis. PER2  
303 was only detected in nuclei when CDK5 was available (Fig. 6G, arrowheads, S6D), but not  
304 when shCdk5 was expressed in SCN cells (Fig. 6G, white arrow, S6D).

305 It has been described that nuclear entry of PER2 involves CRY1 (Kume et al., 1999;  
306 Ollinger et al., 2014). In addition, CRY1-mediated hetero-dimerization stabilizes PER2 by  
307 inhibiting its own ubiquitination (Yagita et al., 2000). Therefore, we tested the interaction  
308 potential of wild-type PER2 and the S394G PER2 mutation with CRY1 by overexpressing the

309 two PER variants in NIH 3T3 cells. Immunoprecipitation of wild-type PER2 pulled down  
310 CRY1; however, the S394G PER2 mutation was significantly less efficient in doing so (Fig.  
311 6H). The small amounts of CRY1 detected may be bound to endogenous PER2 that is present  
312 in the cells. In summary, these experiments suggested that CDK5 affects PER2 stability,  
313 interaction with CRY1, and nuclear localization.

314 **Discussion**

315 Not only do kinases play a crucial role in signal transduction in response to extracellular  
316 stimuli, but they also regulate cycling processes such as the cell cycle and circadian rhythms.  
317 Most cyclin dependent kinases (CDKs) regulate the cell cycle, with few exceptions such as the  
318 cyclin dependent kinase 5 (CDK5). This kinase is ubiquitously expressed and its function is  
319 vital in post-mitotic neurons, where other CDKs are not active. Although CDK5 is not  
320 implicated in cell cycle progression, it can aberrantly activate components of the cell cycle  
321 when it is dysregulated in post-mitotic neurons, leading to cell death (Chang, Vincent, & Shah,  
322 2012). Interestingly, cell death is affected by the clock component PER2 as well (Magnone et  
323 al., 2014), suggesting that both, CDK5 and PER2 act in the same pathway, or that their  
324 pathways cross at a critical point during the regulation of cell death. The synthetic dosage lethal  
325 screen that we performed in yeast supports this notion, as expression of PER2 in yeast lacking  
326 *Cdk5* strongly and significantly compromised growth (Fig. 1A).

327 The kinase CDK5 displays many effects that ensure proper brain function and  
328 development. Mice deficient for *Cdk5* are perinatal lethal (Gilmore, Ohshima, Goffinet,  
329 Kulkarni, & Herrup, 1998; Ohshima et al., 1996). CDK5 influences cortical neuron migration,  
330 cerebellar development, synapse formation and plasticity (Kawauchi, 2014). Here, we  
331 identified a new role for this kinase, i.e. the regulation of the circadian clock *in vivo*. Previously,  
332 CDK5 had been identified to phosphorylate CLOCK and thereby regulate CLOCK stability  
333 and cellular distribution in cells (Kwak et al., 2013). In the SCN, however, NPAS2 may replace  
334 the function of CLOCK (Debruyne et al., 2006; DeBruyne, Weaver, & Reppert, 2007) and  
335 therefore phosphorylation of CLOCK by CDK5 may play a minor role in the SCN. Hence, to  
336 unravel the novel function of CDK5 in the circadian oscillator, we had to restrict ourselves to  
337 the use of SCN tissue and whole animals.

338 CDK5 activity, but not its protein accumulation, displays a diurnal profile in the SCN  
339 with high activity during the night and low activity during the day (Fig. 1C). The activity  
340 displayed a typical on/off profile similar to other CDKs. This finding raises the question how  
341 this diurnal activity of CDK5 may be achieved. On one hand, ATP accumulation, which is  
342 required for phosphorylation, peaks during the night in the SCN (Yamazaki, Maruyama,  
343 Cagampang, & Inouye, 1994). On the other hand, CDK5 activity is regulated by cofactors.  
344 Depending on its cofactor, CDK5 in the brain phosphorylates targets involved in  
345 neurodegenerative diseases (e.g. Tau, MAP1B), neuronal migration (e.g. DCX), and synaptic  
346 signaling (e.g. Ca<sub>v</sub>2.2, Dynamin1, NR2A, DARPP-32) (Kawauchi, 2014). The most obvious  
347 candidates to regulate its time-dependent activity would be cyclins D1 and E, which inhibit  
348 CDK5, or cyclin I, which activates it. Alternatively, other known CDK5 regulators such as p35  
349 may be involved (Shah & Lahiri, 2014). Most likely, positive and negative feedback loops of  
350 other kinases and phosphatases are necessary to generate the on/off profile, although the  
351 components involved in this mechanism are probably different from the ones known for CDKs  
352 that regulate the cell cycle. Interestingly, CK1 phosphorylates and activates CDK5 *in vitro*  
353 (Sharma, Sharma, Amin, Albers, & Pant, 1999) and CDK5 phosphorylates and inhibits CK1δ  
354 (Ianes et al., 2016) establishing a feedback loop between the two kinases. However, additional  
355 research is needed to determine the precise mechanism of diurnal on/off activation of CDK5.

356 CDK5 binds to the C-terminal half of PER2 (Fig. 4G) and phosphorylates it at S394 (Fig.  
357 5), which is located in the PAC domain of the N-terminal half of the protein. Hence, the binding  
358 and phosphorylation sites are far apart, suggesting a structure of PER2 allowing proximity of  
359 the CDK5 binding and phosphorylation domains. We cannot exclude weak binding of CDK5  
360 to the N-terminal half of PER2, because phosphorylation at S394 occurs *in vitro* even in the  
361 absence of the C-terminal half of the PER2 protein (Fig. 5A). This may be due to the fact that  
362 the N-terminal half is overexpressed *in vitro*, which strongly increases the probability of



363 phosphorylation by CDK5 even in the absence of the C-terminal binding domain. It is also  
364 known that p35 (which is used in the *in vitro* kinase assay to activate CDK5) can increase the  
365 interaction between CDK5 and its targets (Hsu et al., 2013).

366 In SCN tissue PER2 phosphorylation at S394 appears to be time of day-dependent, with  
367 highest levels at ZT12 and ZT16 (Fig. 5E) when CDK5 activity is high (Fig. 1C). Compared  
368 with total PER2 protein the S394 phosphorylated form appears to be slightly advanced in its  
369 phase. The difference in phase is probably even larger than it appears here, because the  
370 polyclonal antibody that detects total PER2 also detects the phosphorylated S394 PER2 variant.  
371 This is especially important in the rise of the signal detected, which appears to be identical in  
372 figure 5E. Probably the steep increase between ZT8 and ZT12 represents the S394  
373 phosphorylated forms in both curves. In contrast, the decrease in PER2 levels differs between  
374 total PER2 and P-S394-PER2 form. Consistent with previous studies total PER2 peaks in the  
375 nucleus at ZT16 in the SCN (Nam et al., 2014) when P-S394-PER2 is not detected anymore.  
376 This highlights that additional post-translational modifications of PER2 exist (Toh et al., 2001;  
377 Vanselow et al., 2006) and that P-S394-PER2 disappears faster compared with other modified  
378 forms. Probably, P-S394-PER2 plays a role in PER2 dynamics in terms of shuttling from the  
379 cytoplasm to the nucleus, because P-S394-PER2 can only be observed in the cytoplasmic and  
380 not the nuclear fraction (Fig. 5F). The phosphorylation of PER2 by CDK5 may therefore be  
381 critical for the assembly of a macromolecular complex in the cytoplasm (Aryal et al., 2017),  
382 which then enters the nucleus.

383 The difference in the decline between PER2 and its S394 phosphorylated form in the  
384 SCN may suggest a role of the S394 phosphorylation not only for nuclear transport but also for  
385 PER2 protein stability. The earlier decline of the P-S394-PER2 signal compared with total  
386 PER2 (Fig. 5F) might suggest that the S394 phosphorylated form is less stable. Apparently, the  
387 opposite is the case, as shown in Fig. 6. Pharmacological inhibition of CDK5 (Fig. 6A),

388 CRISPR/Cas9 mediated knock-out of *Cdk5* (Fig. 6B), and shRNA mediated knock-down of  
389 *Cdk5* (Fig. 6C) all led to reduced levels of PER2 in cells. The half-life of PER2 is clearly  
390 increased in the presence of CDK5, rising from about 4 h to 11 h, indicating that  
391 phosphorylation at S394 has a stabilizing function. This is in accordance with previous results  
392 that described almost absent levels of PER2 in the *Per2<sup>Brdm1</sup>* mutant mice (Zheng et al., 1999).  
393 This mouse strain expresses a PER2 lacking 87 amino acids in the PAS and PAC domains,  
394 where the S394 and the CDK5 consensus sequence are localized. CDK5 cannot phosphorylate  
395 this mutant PER2 and therefore the protein is less stable. As a consequence, the formation of  
396 the macromolecular complex responsible for nuclear transport of PER2 is disturbed. This  
397 results in a temporal change of BMAL1/CLOCK/NPAS2 activity, shortening the clock period.  
398 Accordingly, *Per2<sup>Brdm1</sup>* mutant mice display a short period or no circadian period in constant  
399 darkness (Zheng et al., 1999), similar to the phenotype observed for the CDK5 knock-down  
400 mice (Fig. 2B).

401 PER2 stability is affected by CK1 $\delta/\epsilon$ , which phosphorylate PER2 at several sites and  
402 regulate degradation of PER2 via the proteasome (Eide et al., 2005; Y. Xu et al., 2007;  
403 Narasimamurthy et al., 2018). This effect is similar to the action of dbt on *Drosophila per*.  
404 Interestingly, CDK5 can phosphorylate CK1 $\delta$  to reduce its activity (Ianes et al., 2016). This  
405 phosphorylation could cross-regulate the activities of both kinds of kinases to fine-tune the  
406 amount of PER2. This is evidenced by the observation, that knock-down of *Cdk5* in *Per2<sup>Brdm1</sup>*  
407 mutant mice further shortens period in these animals (Fig. 2D, E). The mammalian orthologue  
408 of shg, Gsk3 $\beta$ , does not phosphorylate the mammalian Tim but the nuclear receptor NR1D1  
409 (Mukherji, Kobiita, & Chambon, 2015). This change in substrate may be related to the shift in  
410 function of the CRYs to replace Tim in the mammalian circadian oscillator. Similar to shg,  
411 CDK5 phosphorylation of PER2 increases its half-life (Fig. 6D). Lack of CDK5, and therefore  
412 lack of phosphorylation at S394 of PER2, leads to proteasomal degradation of PER2 as

413 evidenced by epoxomycin treatment, which inhibits the proteasome and reduces the decline of  
414 PER2 levels in the cell (Fig. 6E). This is consistent with a recent report that describes the  
415 ubiquitin ligase MDM2 as controlling PER2 degradation via the proteasome (Liu et al., 2018).  
416 However, it is not clear whether it is the phosphorylation at S394 *per se* or the capacity to  
417 participate in a macromolecular complex to enter the nucleus that stabilizes PER2. In any case,  
418 this phosphorylation appears to be essential for nuclear entry of PER2 (Fig. 6F, G).

419 A recent report showed that mammalian PER represses and de-represses transcription by  
420 displacing BMAL1-CLOCK from promoters in a CRY-dependent manner (Chiou et al., 2016).  
421 Our data support these findings. PER2 containing a S394G mutation, which abolishes CDK5-  
422 mediated phosphorylation, displayed reduced interaction potential with CRY1 (Fig. 6H).  
423 Because CRY1 is involved in nuclear transport of PER2 (Kume et al., 1999; Ollinger et al.,  
424 2014; Yagita et al., 2000), lack of interaction with the S394G mutant form of PER2 leaves this  
425 protein in the cytoplasm, unable to enter the nucleus (Fig. 6G). The present data are also in  
426 agreement with previous experiments in which we investigated the role of protein phosphatase  
427 1 (PP1) and its effects on the circadian clock (Schmutz et al., 2011). Expression of a specific  
428 PP1 inhibitor in the brain lengthened circadian period and increased PER2 levels and its nuclear  
429 accumulation in neurons. These effects are all opposite to what we observe when PER2 is not  
430 phosphorylated at S394. Therefore, it could be speculated that PP1 is involved in the  
431 dephosphorylation of P-S394, thereby counterbalancing phosphorylation of this site by CDK5.

432 Taken together, our results indicate that CDK5 phosphorylates PER2 at S394. This  
433 phosphorylation appears to be important for PER2 to bind efficiently to CRY1 in order to allow  
434 entry of PER2 into the nucleus. Inhibition of CDK5 in cells leads to degradation of PER2 in  
435 the proteasome (Fig. 7). Inhibition of CDK5 *in vivo* inhibits nuclear entry of PER2 and shortens  
436 period to a similar extent as observed in *Per2<sup>Brdm1</sup>* mutant mice, which express a barely  
437 detectable level of protein lacking 87 amino acids including S394. Taken together, CDK5

438 regulates the circadian clock and influences PER2 nuclear transport via phosphorylation.  
439 Because PER2 is involved in several physiologically relevant pathways in addition to clock  
440 regulation (Albrecht, Bordon, Schmutz, & Ripperger, 2007), PER2 may mediate several  
441 biological functions that were previously linked to CDK5, such as the regulation of the brain  
442 reward system (Benavides et al., 2007; Bibb et al., 2001) and psychiatric diseases (Engmann  
443 et al., 2011; Zhu et al., 2012).

444  
445

446

## 447 **Methods**

448 **Animals and housing.** All mice were housed with food and water *ad libidum* in transparent  
449 plastic cages (267 mm long × 207 mm wide × 140 mm high; Techniplast Makrolon type 2  
450 1264C001) with a stainless-steel wire lid (Techniplast 1264C116), kept in light- and  
451 soundproof ventilated chambers. All mice were entrained to a 12:12-h LD cycle, and the time  
452 of day was expressed as Zeitgeber time (ZT; ZT0 lights on, ZT12 lights off). Two- to four-  
453 month-old males were used for the experiments. Housing as well as experimental procedures  
454 were performed in accordance with the guidelines of the Schweizer Tierschutzgesetz and the  
455 declaration of Helsinki. The state veterinarian of the Canton of Fribourg approved the protocol.  
456 The floxed *Per2* mice (Chavan et al., 2016) are available at the European Mouse Mutant  
457 Archive (EMMA) strain ID EM:10599, B6;129P2-*Per2*<sup>tm1Ual</sup>/Biat.

458

459 **Synthetic dosage lethal (SDL) screen.** The SDL screen was essentially performed as  
460 described earlier (Measday et al., 2005; Tong et al., 2001). Briefly, the bait strain Y2454  
461 (MAT $\alpha$  *mfa1* $\Delta$ ::*MFA1pr-HIS3*, *can1* $\Delta$ , *his3* $\Delta$ 1, *leu2* $\Delta$ 0, *ura3* $\Delta$ 0, *lys2* $\Delta$ 0) carrying the plasmid  
462 YCplF2-*mPer2* (that drives expression of PER2 from the galactose-inducible *GAL1* promoter)  
463 was inoculated into 50 mL glucose-containing synthetic dropout medium lacking leucine (SD-

464 Leu) and grown at 30°C overnight with shaking. Cells were then centrifuged, resuspended in  
465 20 mL of the supernatant, poured into a sterile rectangular petri dish, spotted in a 96-well  
466 format on rectangular SD-Leu plates (coined “bait plates” hereafter) using a Biomek 2000  
467 robot (Beckman Coulter, USA), and then grown at 30° C for three days. In parallel, the gene  
468 deletion array in the strain BY4741 (MATa *his3Δ1*, *leu2Δ0*, *met15Δ0*, *ura3Δ0*) was spotted  
469 from the storage plates onto fresh G418-containing YPD plates (96-well format) and also  
470 grown at 30°C for three days. For the mating procedure (overnight at 30°C), colonies from bait  
471 plates were (robotically) spotted onto plates containing YPD (plus adenine) and the colonies  
472 from the gene deletion array plates were (each separately and in duplicate) spotted on top of  
473 them. The next day, the colonies were transferred to G418-containing SD plates lacking lysine,  
474 methionine, and leucine (SD-Lys/Met/Leu/+G418) to select for diploids that harbour the  
475 YCplF2-*mPer2* plasmid. Diploids were then spotted onto plates containing sporulation  
476 medium (10 g L<sup>-1</sup> potassium acetate, 1g L<sup>-1</sup> yeast extract, 0.1 g L<sup>-1</sup> glucose, 2% w/v agar,  
477 supplemented with uracil, histidine, and G418) and incubated at 24°C. After 9 days, tetrads  
478 were observed and the colonies were transferred to canavanine-containing SD plates lacking  
479 arginine and histidine (SD-Arg/His/+canavanine) to select for MATa haploids. Following  
480 growth at 30°C for three days, a second haploid selection was carried out by spotting the  
481 colonies on SD-Arg/His/Leu/+canavanine plates (to select for MATa haploids containing the  
482 YCplF2-*mPer2* plasmid). Following growth at 30°C for two days, a third haploid selection was  
483 carried out by spotting cells on SD-Arg/His/Leu/+canavanine/+G418 plates (to select for  
484 MATa haploids containing the YCplF2-*mPer2* plasmid as well as the respective gene deletions  
485 of the yeast knockout collection). Following incubation at 30°C for five days, colonies were  
486 then spotted in parallel onto SD-Arg/His/Leu/+G418 plates and on SD-Raf/Gal-  
487 Arg/His/Leu/+G418 plates (containing 1% raffinose and 2% galactose as carbon sources) to  
488 induce expression of PER2. Both types of plates were incubated at 30°C for four days and

489 photographed every day. Strains that grew significantly less well on SD-Raf/Gal-  
490 Arg/His/Leu/+G418 than on SD-Arg/His/Leu/+G418 included *eap1Δ*, *gnd1Δ*, and *pho85Δ*. In  
491 control experiments, the respective original yeast knockout collection mutants were  
492 transformed in parallel with the YCplF2-*mPer2* or the empty YCplF2 plasmid (Foreman &  
493 Davis, 1994), selected on SD-Leu plates, grown overnight in liquid SD-Leu, spotted (10-fold  
494 serial dilutions) on SD-Raf/Gal-Leu plates, and grown for 3 days at 30° (Figure 1A). Please  
495 note that all media containing G418 were made with glutamate (1 g L<sup>-1</sup>) instead of ammonium  
496 sulfate as nitrogen source, as recommended in (Tong et al., 2001).

497

498 **Adeno Associate Virus (AAV) production and stereotaxic injections.** Adeno Associate  
499 Viruses (AAVs) were produced in the Viral Vector Facility (ETH Zurich). Plasmids used for  
500 the production are available on the VVF web site. Two constructs were produced. ssAAV-9/2-  
501 hSyn1-chI[mouse(shCdk5)]-EGFP-WPRE-SV40p(A) carried the shRNA against Cdk5 (shD,  
502 see Fig. S1A or Supplemental Table 2) which knocked down only neuronal *Cdk5*. ssAAV-9/2-  
503 hSyn1-chI[1x(shNS)]-EGFP-WPRE-SV40p(A) was the scrambled control.

504 Stereotaxic injections were performed on 8-week-old mice under isofluorene anaesthesia using  
505 a stereotaxic apparatus (Stoelting). The brain was exposed by craniotomy and the Bregma was  
506 used as reference point for all coordinates. AAVs were injected bilaterally into the SCN  
507 (Bregma: anterior-posterior (AP) – 0.40 mm; medial-lateral (ML) ± 0.00 mm; dorsal-ventral  
508 (DV) – 5.5 mm, angle +/- 3°) using a hydraulic manipulator (Narishige: MO-10 one-axis oil  
509 hydraulic micromanipulator, [http://products.narishige-group.com/group1/MO-](http://products.narishige-group.com/group1/MO-10/electro/english.html)  
510 [10/electro/english.html](http://products.narishige-group.com/group1/MO-10/electro/english.html)) at a rate of 40 nL/min through a pulled glass pipette (Drummond, 10  
511 µl glass micropipet; Cat number: 5-000-1001-X10). The pipette was first raised 0.1mm to allow  
512 spread of the AAVs, and later withdrawn 5 min after the end of the injection. After surgery,

513 mice were allowed to recover for 2 weeks and entrained to LD 12:12 prior to behavior and  
514 molecular investigations.

515

516 **Locomotor activity monitoring.** Analysis of locomotor activity parameters was done by  
517 monitoring wheel-running activity, as described in (Jud, Schmutz, Hampp, Oster, & Albrecht,  
518 2005), and calculated using the ClockLab software (Actimetrics). Briefly, for the analysis of  
519 free-running rhythms, animals were entrained to LD 12:12 and subsequently released into  
520 constant darkness (DD). Internal period length ( $\tau$ ) was determined from a regression line drawn  
521 through the activity onsets of ten days of stable rhythmicity under constant conditions. Total  
522 and daytime activity, as well as activity distribution profiles, was calculated using the  
523 respective inbuilt functions of the ClockLab software (Acquisition Version 3.208, Analysis  
524 version 6.0.36). Numbers of animals used in the behavioral studies are indicated in the  
525 corresponding figure legends.

526

527 **Immunofluorescence.** Animals used for the immunohistochemistry were killed at appropriate  
528 ZTs indicated in the corresponding figure legends. Brains were perfused with 0.9% NaCl and  
529 4% PFA. Perfused brains were cryoprotected by 30% sucrose solution and sectioned (40  $\mu$ m,  
530 coronal) using a cryostat. Sections chosen for staining were placed in 24-well plates (2 sections  
531 per well), washed three times with 1x TBS (0.1 M Tris/0.15 M NaCl) and 2x SSC (0.3 M  
532 NaCl/0.03 M tri-Na-citrate pH 7). Antigen retrieval was performed with 50% formamide/2x  
533 SSC by heating to 65°C for 50 min. Then, sections were washed twice in 2x SSC and three  
534 times in 1x TBS pH 7.5, before blocking them for 1.5 h in 10% fetal bovine serum  
535 (Gibco)/0.1% Triton X-100/1x TBS at RT. After the blocking, the primary antibodies, rabbit  
536 anti-PER2-1 1:200 (Alpha Diagnostic, Lot numb. 869900A1.2-L), mouse anti-Cdk5 clone 2H6  
537 1:20 (Origene, Lot numb. A001), and rabbit anti-GFP 1:500 (abcam ab6556) diluted in 1%

538 FBS/0.1% Triton X-100/1x TBS, were added to the sections and incubated overnight at 4°C.  
539 The next day, sections were washed with 1x TBS and incubated with the appropriate  
540 fluorescent secondary antibodies diluted 1:500 in 1% FBS/0.1% Triton X-100/1x TBS for 3 h  
541 at RT. (Alexa Fluor 488-AffiniPure Donkey Anti-Rabbit IgG (H+L) no. 711–545–152, Lot:  
542 132876, Alexa Fluor647-AffiniPure Donkey Anti-Mouse IgG (H+L) no. 715–605–150, Lot:  
543 131725, Alexa Fluor647-AffiniPure Donkey Anti-Rabbit IgG (H+L) no. 711–602–152, Lot:  
544 136317 and all from Jackson Immuno Research). Tissue sections were stained with DAPI  
545 (1:5000 in PBS; Roche) for 15 min. Finally, the tissue sections were washed again twice in 1x  
546 TBS and mounted on glass microscope slides. Fluorescent images were taken by using a  
547 confocal microscope (Leica TCS SP5), and images were taken with a magnification of 40x or  
548 63x. Images were processed with the Leica Application Suite Advanced Fluorescence  
549 2.7.3.9723 according to the study by Schnell et al. (Schnell et al., 2014).  
550 Immunostained sections were quantified using ImageJ version 1.49. Background was  
551 subtracted and the detected signal was divided by the area of measurement. An average value  
552 obtained from three independent areas for every section was used. The signal coming from  
553 sections obtained from silenced mice was quantified as relative amount to the scramble, which  
554 was set to 1. Statistical analysis was performed on 3 animals per treatment.

555

556 **Cell culture.** NIH3T3 mouse fibroblast cells (ATCCRCRL-1658™) were maintained in  
557 Dulbecco's modified Eagle's medium (DMEM), containing 10% fetal calf serum (FCS) and  
558 100 U/mL penicillin-streptomycin at 37°C in a humidified atmosphere containing 5% CO<sub>2</sub>.  
559 Cdk5 KO cells were produced applying the CRISPR/Cas9 technique according to the  
560 manufacturer's protocol of the company (Origene, SKU # KN303042).

561



562 **Plasmids.** The following plasmids used were previously described: pSCT-1, pSCT-1mPer2,  
563 pSCT-1 mPer-V5, pSCT1 ΔPasA mPer2 -V5, pSCT1 ΔPasB mPer2 -V5 (Langmesser, Tallone,  
564 Bordon, Rusconi, & Albrecht, 2008) (Schmutz, Ripperger, Baeriswyl-Aebischer, & Albrecht,  
565 2010). pSCT-1 Cdk5-HA, pet-15b Cdk5-HIS, Gex-4T Per2 1-576, pGex-4T Per2 577-1256  
566 were produced for this paper. The full-length cDNA (or partial fragments) encoding PER2 and  
567 the full-length Cdk5 were previously sub-cloned in the TOPO vector according to the  
568 manufacturer's protocol (Catalog numbers pCR™2.1-TOPO® vector: K4500-01). They were  
569 subsequently transferred into the plasmid pSCT-1 using appropriate restriction sites. pGex-4T  
570 Per2 1-576 S394G, S394D, pSCT-1 mPer2 S394G were obtained using site-specific  
571 mutagenesis according to the manufacturer's protocol on the requested codon carrying the  
572 interested amino acid of interest (Agilent Catalog # 200518). For accession numbers, vectors,  
573 mutations, and primers sources, see Supplemental Table 2.

574

575 **Transfection and co-immunoprecipitation of overexpressed proteins.** NIH 3T3 cells were  
576 transfected in 10 cm dishes at about 70% of their total confluency using linear  
577 polyethylenimine (LINPEI25; Polysciences Europe). The amounts of expression vectors were  
578 adjusted to yield comparable levels of expressed protein. Thirty hours after transfection, protein  
579 extracts were prepared. With regard to immunoprecipitation, each antibody mentioned in the  
580 paper was used in the conditions indicated by the respective manufacturer. The next day,  
581 samples were captured with 50 μL at 50% (w/v) of protein-A agarose beads (Roche) at 50%  
582 (w/v) and the reaction was kept at 4° C for 3 h on a rotary shaker. Prior to use, beads were  
583 washed 3 times with the appropriate protein buffer and resuspended in the same buffer (50%  
584 w/v). The beads were collected by centrifugation and washed 3 times with NP-40 buffer (100  
585 mM Tris-HCl pH7.5, 150 mM NaCl, 2 mM EDTA, 0.1% NP-40). After the final wash, beads  
586 were resuspended in 2% SDS, 10% glycerol, 63 mM Trish-HCL pH 6.8 and proteins were

587 eluted for 15 min at RT. Laemmli buffer was finally added, samples were boiled for 5 min at  
588 95° C and finally loaded onto 10% SDS-PAGE gels (Laemmli, 1970).

589

590 **Total protein extraction from cells (Ripa method).** Medium was aspirated from cell plates,  
591 which were washed 2 times with 1x PBS (137mM NaCl, 7.97 mM Na<sub>2</sub>HPO<sub>4</sub> x 12 H<sub>2</sub>O, 2.68  
592 mM KCl, 1.47 mM KH<sub>2</sub>PO<sub>4</sub>). Then PBS was added again and plates were kept 5 min at 37°C.  
593 NHI3T3 or HEK cells were detached and collected in tubes and washed 2 times with 1x PBS.  
594 After the last washing, pellets were frozen in liquid N<sub>2</sub>, resuspended in Ripa buffer (50 mM  
595 Tris-HCl pH7.4, 1% NP-40, 0.5% Na-deoxycholate, 0.1 % SDS, 150 mM NaCl, 2 mM EDTA,  
596 50 mM NaF) with freshly added protease or phosphatase inhibitors, and homogenized by using  
597 a pellet pestle. After that samples were centrifuged for 15 min at 16'100 g at 4° C. The  
598 supernatant was collected in new tubes and pellet discarded.

599

600 **Total protein extraction from brain tissue.** Total brain or isolated SCN tissue was frozen in  
601 liquid N<sub>2</sub>, and resuspended in lysis buffer (50 mM Tris-HCl pH 7.4, 150 mM NaCl, 0.25%  
602 SDS, 0.25% sodium deoxycholate, 1 mM EDTA) and homogenized by using a pellet pestle.  
603 Subsequently, samples were kept on ice for 30 min and vortexed 5 times for 30 sec each time.  
604 The samples were centrifuged for 20 min at 12'000 rpm at 4° C. The supernatant was collected  
605 in new tubes and the pellet discarded.

606

607 **Nuclear/cytoplasmic fractionation.** Tissues or cells were resuspended in 100 mM Tris-HCl  
608 pH 8.8/10 mM DTT and homogenized with a disposable pellet pestle. After 10 min incubation  
609 on ice, the samples were centrifuged at 2'500 g for 2 min at 4°C and the supernatant discarded.  
610 After adding 90 µL of completed cytoplasmic lysis buffer (10 mM EDTA, 1 mM EGTA, 10  
611 mM Hepes pH 6.8, 0.2% Triton X-100, protease inhibitor cocktail (Roche), NaF, PMSF, β-

612 glycerophosphate), the pellet was resuspended by vortexing, followed by centrifugation at  
613 5'200 rpm for 2 min at 4°C. The supernatant transferred into a fresh 1.5 mL tube was the  
614 CYTOPLASMIC EXTRACT. The pellet was washed three times with cytoplasmic lysis buffer  
615 and resuspended in 45 µL 1x NDB (20% glycerol, 20 mM Hepes pH 7.6, 0.2 mM EDTA, 2  
616 mM DTT) containing 2x proteinase and phosphatase inhibitors followed by adding 1 volume  
617 of 2x NUN (2 M Urea, 600 mM NaCl, 2% NP-40, 50 mM Hepes pH 7.6). After vortexing the  
618 samples were incubated 30 min on ice, centrifuged 30 min at 13'000 rpm at 4°C and the  
619 supernatant that was transferred into a fresh tube was the NUCLEAR EXTRACT.

620

621 **Immunoprecipitation using brain tissue extracts.** A protein amount corresponding to  
622 between 400 and 800 µg of total extract was diluted with the appropriate protein lysis buffer  
623 in a final volume of 250 µL and immunoprecipitated using the indicated antibody (ratio 1:50)  
624 and the reaction was kept at 4° C overnight on a rotary shaker. The day after, samples were  
625 captured with 50 µL of 50% (w/v) protein-A agarose beads (Roche) and the reaction was kept  
626 at 4° C for 3 h on a rotary shaker. Prior to use, beads were washed 3 times with the appropriate  
627 protein buffer and resuspended in the same buffer (50% w/v). The beads were collected by  
628 centrifugation and washed 3 times with NP-40 buffer (100 mM Tris-HCl pH7.5, 150 mM NaCl,  
629 2 mM EDTA, 0.1% NP-40). After the final wash, beads were resuspendend in 2% SDS 10%,  
630 glycerol, 63 mM Trish-HCL pH 6.8 and proteins were eluted for 15 min at RT. Laemmli buffer  
631 was finally added, samples were boiled 5 min at 95° C and loaded onto 10% SDS-PAGE gels.

632

633 **Pull-down assay with GST-Per2 fragments.** GST-fused recombinant Per2 proteins were  
634 expressed in the *E. coli* Rosetta strain [plasmids: GST-Per2 N-M (1-576), GST-Per2 M-C (577-  
635 1256)]. Proteins were induced with 1 mM IPTG (Sigma-Aldrich) for 3 h at 30°C. Subsequently,  
636 proteins were extracted in an appropriate GST lysis buffer (50 mM Tris-Cl pH 7.5, 150 mM

637 NaCl, 5% glycerol) adjusted to 0.1% Triton X-100 and purified to homogeneity with  
638 glutathione-agarose beads for 2 h at 4°C. The beads were then incubated overnight at 4° C and  
639 washed with GST lysis buffer adjusted with 1 mM DTT. Subsequently, elution with 10 mM  
640 reduced glutathione took place for 15 min at room temperature. Elution was stopped by adding  
641 Laemmli buffer and samples were loaded onto the gel after 5 min at 95° C and WB was  
642 performed using anti-GST (Sigma no. 06-332) and anti-HA antibodies (Roche no.  
643 11867423001) for immunoblotting.

644

645 **CRISPR/Cas9 *Cdk5* knock-out cell line.** The CRISPR/Cas9 *Cdk5* cell line was produced  
646 starting from NIH3T3 cells using a kit provided by Origene ([www.origene.com](http://www.origene.com)). The knock-  
647 out cell line was produced according to the manufacturer's protocol. Briefly, cells at 80% of  
648 confluency were co-transfected with a donor vector containing the homologous arms and  
649 functional cassette, and the guide vector containing the sequence that targets the *Cdk5* gene. In  
650 parallel, a scrambled negative guide was also co-transfected with a donor vector. 48 h after  
651 transfection the cells were split 1:10 and grown for 3 days. Cells were split another 7 times  
652 (this time is necessary to eliminate the episomal form of donor vector, in order to have only  
653 integrated forms). Then, single colonies were produced and clones were analyzed by PCR in  
654 order to find those clones that did not express *Cdk5* RNA. Positive clones were re-amplified.

655

656 PCR primers for genomic *Cdk5*:

657 FW: 5'-tgtgagtaccacctctctgcaa-3'

658 RW: 5'-ttaaacaggccaggcccc-3'

659

660 **Knockdown of *Cdk5*.** About 24 h after seeding cells, different shRNA *Cdk5* plasmids  
661 (Origene TL515615 A/B/C/D *Cdk5* shRNA) were transfected to knock down *Cdk5* according

662 to the manufacturer's instructions. The knock-down efficiency was assessed at 48 h post  
663 transduction by Western blotting. Scrambled shRNA plasmid (Origene TR30021) was used as  
664 a negative control.

665

666 **Cycloheximide treatment.** NIH3T3 cells were treated with 100  $\mu$ M cycloheximide 48 h after  
667 transfection with the indicated vectors, and cells were harvested 0, 3, and 6 h after treatment.

668

669 **Proteasome inhibitor treatment.** About 48 h after transfection with either scrambled or  
670 shCdk5, cells where *Cdk5* was silenced were treated for 12 h with either DMSO (vehicle) or  
671 epoxomicin (Sigma-Aldrich) at a final concentration of 0.2  $\mu$ M. Samples were collected, and  
672 proteins extracted followed by Western blotting.

673

674 ***In vitro* kinase assay.** Recombinant GST-fused PER2 protein fragments were expressed and  
675 purified from the BL21 Rosetta strain of *E. coli* according to the manufacturer's protocol  
676 described before, using glutathione-sepharose affinity chromatography (GE Healthcare). Each  
677 purified protein (1  $\mu$ g) was incubated in the presence or absence of recombinant Cdk5/p35 (the  
678 purified recombinant N-terminal His6-tagged human Cdk5 and N-terminal GST-tagged human  
679 p25 were purchased from Millipore). Reactions were carried out in a reaction buffer (30 mM  
680 Hepes, pH 7.2, 10 mM MgCl<sub>2</sub>, and 1 mM DTT) containing [ $\gamma$ -<sup>32</sup>P] ATP (10 Ci) at room  
681 temperature for 1 h and then terminated by adding SDS sample buffer and boiling for 10 min.  
682 Samples were subjected to SDS-PAGE, stained by Coomassie Brilliant Blue, and dried, and  
683 then phosphorylated proteins were detected by autoradiography.

684

685 ***In vitro* kinase assay using immunoprecipitated Cdk5 from SCN.** CDK5 was  
686 immunoprecipitated from SCN samples at different ZTs (circa 600  $\mu$ g of protein extract) (Fig.

687 S7). After immunoprecipitation at 4° C overnight with 2x Protein A agarose (Sigma-Aldrich),  
688 samples were diluted in washing buffer and split in two halves. One half of the IP was used for  
689 an *in vitro* kinase assay. Briefly, 1 µg of histone H1 (Sigma-Aldrich) was added to the  
690 immunoprecipitated CDK5 and assays were carried out in reaction buffer (30 mM Hepes, pH  
691 7.2, 10 mM MgCl<sub>2</sub>, and 1 mM DTT) containing [ $\gamma$ -<sup>32</sup>P] ATP (10 Ci) at room temperature for  
692 1 h and then terminated by adding SDS sample buffer and boiling for 5 min. Samples were  
693 subjected to 15% SDS-PAGE, stained by Coomassie Brilliant Blue, and dried, and then  
694 phosphorylated histone H1 was detected by autoradiography. The other half of the IP was used  
695 for Western blotting to determine the total amount of CDK5 immunoprecipitated from the SCN  
696 samples. To quantify the kinase activity at each time point, the following formula was used:  
697 ( $^{32}$ P] H1/total H1 for each reaction)/CDK5 IP protein.

698

699 **Filter-aided *in vitro* kinase assay, phosphopeptide enrichment and mass spectrometry**  
700 **analyses.** Filter-aided *in vitro* kinase assays and mass spectrometry analyses were performed  
701 essentially as described (Hatakeyama et al., 2019). Briefly, recombinant Cdk5/p35 (Millipore)  
702 was incubated with the GST-fused PER2 protein fragment. On 10 kDa MW-cutoff filters  
703 (PALL) samples were incubated in kinase buffer containing 50 mM Hepes, pH 7.4, 150 mM  
704 NaCl, 0.625 mM DTT, Phostop tablets (Roche), 6.25 mM MgCl<sub>2</sub>, and 1.8 mM ATP at 30°C  
705 for 1 h. Samples without ATP were used as negative control. Assays were quenched by 8 M  
706 urea and 1 mM DTT. Protein digestion for MS analysis was performed overnight (Wisniewski,  
707 Zougman, Nagaraj, & Mann, 2009). Phosphopeptides were enriched by metal oxide affinity  
708 enrichment using titanium dioxide (GL Sciences Inc., Tokyo, Japan) (Zarei, Sprenger,  
709 Rackiewicz, & Dengjel, 2016).

710 LC-MS/MS measurements were performed on a QExactive Plus mass spectrometer coupled to  
711 an EasyLC 1000 nanoflow-HPLC. Peptides were separated on fused silica HPLC-column tip

712 (I.D. 75  $\mu\text{m}$ , New Objective, self-packed with ReproSil-Pur 120 C18-AQ, 1.9  $\mu\text{m}$  [Dr. Maisch,  
713 Ammerbuch, Germany] to a length of 20 cm) using a gradient of A (0.1% formic acid in water)  
714 and B (0.1% formic acid in 80% acetonitrile in water): loading of sample with 0% B with a  
715 flow rate of 600  $\text{nL min}^{-1}$ ; separation ramp from 5-30% B within 85 min with a flow rate of  
716 250  $\text{nL min}^{-1}$ . NanoESI spray voltage was set to 2.3 kV and ion-transfer tube temperature to  
717 250°C; no sheath and auxiliary gas was used. Mass spectrometers were operated in the data-  
718 dependent mode; after each MS scan (mass range  $m/z = 370 - 1750$ ; resolution: 70,000) a  
719 maximum of ten MS/MS scans were performed using a normalized collision energy of 25%, a  
720 target value of 1,000 and a resolution of 17,500. The MS raw files were analyzed using  
721 MaxQuant Software version 1.4.1.2 (Cox & Mann, 2008) for peak detection, quantification  
722 and peptide identification using a full length Uniprot Mouse database (April, 2016) and  
723 common contaminants such as keratins and enzymes used for digestion as reference.  
724 Carbamidomethylcysteine was set as fixed modification and protein amino-terminal  
725 acetylation, serine-, threonine- and tyrosine-phosphorylation, and oxidation of methionine  
726 were set as variable modifications. The MS/MS tolerance was set to 20 ppm and three missed  
727 cleavages were allowed using trypsin/P as enzyme specificity. Peptide, site and protein FDR  
728 based on a forwards-reverse database were set to 0.01, minimum peptide length was set to 7,  
729 and minimum number of peptides for identification of proteins was set to one, which must be  
730 unique. The “match-between-run” option was used with a time window of 1 min. The mass  
731 spectrometry proteomics data have been deposited to the ProteomeXchange Consortium via  
732 the PRIDE partner repository with the dataset identifier PXD012068.

733 Project Name: Cyclin dependent kinase 5 (CDK5) regulates the circadian clock

734 Project accession: PXD012068

735 Reviewer account details:

736 Username: [reviewer33841@ebi.ac.uk](mailto:reviewer33841@ebi.ac.uk)

737 Password: DEBd5FKk

738

739 **Generation of an antibody against phospho-serine 394.** We raised in mouse a specific  
740 monoclonal antibody recognizing the phosphorylated form of serine 394 of PER2 in  
741 collaboration with GenScript Company. The sequence used for the immunogen preparation  
742 was: FDY {pSer} PIRFRTRNGEC. 3 Balb/c mice and 3 C57 mice were immunized with  
743 conventional strategies and antisera obtained from those animals were used for the first control  
744 experiment performed by *in vitro* kinase assay (Fig. S5C). The positive antiserum was used for  
745 the cell fusions. Subsequently, a screening with 16 96-well plates (from 2x10E4 clones) was  
746 performed by indirect ELISA, primary screening with phospho-peptide, then counter-screening  
747 with non-phospho-peptide. The obtained supernatants were tested by *in vitro* kinase assay in  
748 order to screen which one was better recognized the phospho-form of PER2 S394 (Fig. S5D).  
749 Finally, 5 selected positive primary clones selected were subcloned by limiting dilution and  
750 tested as final antibody (Fig. S5E).

751

752 **Statistical analysis.** Statistical analysis of all experiments was performed using GraphPad  
753 Prism6 software. Depending on the type of data, either an unpaired t-test, or one- or two-way  
754 ANOVA with Bonferroni or Tukey's post-hoc test was performed. Values considered  
755 significantly different are highlighted. [ $p < 0.05$  (\*),  $p < 0.01$  (\*\*), or  $p < 0.001$  (\*\*\*)].

756

757

758



759 **Acknowledgments**

760

761 We thank Stéphanie Aebischer, Antoinette Hayoz, Cressida Harvey, Naila Ben Fredi, Jean-

762 Charles Paterna (Viral Vector Facility, University of Zürich) and the Bioimage platform

763 (University of Fribourg) for technical support. Funding from the Swiss National Science

764 Foundation (31003A\_166682, 310030\_166474/1 and 316030\_177088) is acknowledged.

765 A.B. was supported by a fellowship from the Fondazione Cenci Bolognetti, Istituto Pasteur.

766

767

768 **Declaration of interests**

769

770 The authors declare no competing interests.

771

772

773 **References**

774

775 Abarca, C., Albrecht, U., & Spanagel, R. (2002). Cocaine sensitization and reward are under  
776 the influence of circadian genes and rhythm. *Proc Natl Acad Sci U S A*, *99*(13), 9026-  
777 9030. doi:10.1073/pnas.142039099

778 Albrecht, U., Bordon, A., Schmutz, I., & Ripperger, J. (2007). The multiple facets of Per2.  
779 *Cold Spring Harb Symp Quant Biol*, *72*, 95-104. doi:10.1101/sqb.2007.72.001

780 Aryal, R. P., Kwak, P. B., Tamayo, A. G., Gebert, M., Chiu, P. L., Walz, T., & Weitz, C. J.  
781 (2017). Macromolecular Assemblies of the Mammalian Circadian Clock. *Mol Cell*,  
782 *67*(5), 770-782 e776. doi:10.1016/j.molcel.2017.07.017

783 Benavides, D. R., Quinn, J. J., Zhong, P., Hawasli, A. H., DiLeone, R. J., Kansy, J. W., . . .  
784 Bibb, J. A. (2007). Cdk5 modulates cocaine reward, motivation, and striatal neuron  
785 excitability. *J Neurosci*, *27*(47), 12967-12976. doi:10.1523/JNEUROSCI.4061-  
786 07.2007

787 Bibb, J. A., Chen, J., Taylor, J. R., Svenningsson, P., Nishi, A., Snyder, G. L., . . . Greengard,  
788 P. (2001). Effects of chronic exposure to cocaine are regulated by the neuronal protein  
789 Cdk5. *Nature*, *410*(6826), 376-380. doi:10.1038/35066591

790 Brinkkoetter, P. T., Olivier, P., Wu, J. S., Henderson, S., Krofft, R. D., Pippin, J. W., . . .  
791 Shankland, S. J. (2009). Cyclin I activates Cdk5 and regulates expression of Bcl-2 and  
792 Bcl-XL in postmitotic mouse cells. *J Clin Invest*, *119*(10), 3089-3101.  
793 doi:10.1172/JCI37978

794 Chang, K. H., Vincent, F., & Shah, K. (2012). Deregulated Cdk5 triggers aberrant activation  
795 of cell cycle kinases and phosphatases inducing neuronal death. *J Cell Sci*, *125*(Pt 21),  
796 5124-5137. doi:10.1242/jcs.108183

797 Chavan, R., Feillet, C., Costa, S. S., Delorme, J. E., Okabe, T., Ripperger, J. A., & Albrecht,  
798 U. (2016). Liver-derived ketone bodies are necessary for food anticipation. *Nat*  
799 *Commun*, *7*, 10580. doi:10.1038/ncomms10580

800 Chiou, Y. Y., Yang, Y., Rashid, N., Ye, R., Selby, C. P., & Sancar, A. (2016). Mammalian  
801 Period represses and de-represses transcription by displacing CLOCK-BMAL1 from  
802 promoters in a Cryptochrome-dependent manner. *Proc Natl Acad Sci U S A*, *113*(41),  
803 E6072-E6079. doi:10.1073/pnas.1612917113

804 Chong, S. Y., Ptacek, L. J., & Fu, Y. H. (2012). Genetic insights on sleep schedules: this  
805 time, it's PERsonal. *Trends Genet*, *28*(12), 598-605. doi:10.1016/j.tig.2012.08.002

806 Contreras-Vallejos, E., Utreras, E., & Gonzalez-Billault, C. (2012). Going out of the brain:  
807 non-nervous system physiological and pathological functions of Cdk5. *Cell Signal*,  
808 *24*(1), 44-52. doi:10.1016/j.cellsig.2011.08.022

809 Cox, J., & Mann, M. (2008). MaxQuant enables high peptide identification rates,  
810 individualized p.p.b.-range mass accuracies and proteome-wide protein quantification.  
811 *Nat Biotechnol*, *26*(12), 1367-1372. doi:10.1038/nbt.1511

812 Darlington, T. K., Wager-Smith, K., Ceriani, M. F., Staknis, D., Gekakis, N., Steeves, T. D., .  
813 . . . Kay, S. A. (1998). Closing the circadian loop: CLOCK-induced transcription of its  
814 own inhibitors per and tim. *Science*, *280*(5369), 1599-1603.

815 DeBruyne, J. P., Noton, E., Lambert, C. M., Maywood, E. S., Weaver, D. R., & Reppert, S.  
816 M. (2006). A clock shock: mouse CLOCK is not required for circadian oscillator  
817 function. *Neuron*, *50*(3), 465-477. doi:10.1016/j.neuron.2006.03.041

818 DeBruyne, J. P., Weaver, D. R., & Reppert, S. M. (2007). CLOCK and NPAS2 have  
819 overlapping roles in the suprachiasmatic circadian clock. *Nat Neurosci*, *10*(5), 543-  
820 545. doi:10.1038/nn1884

- 821 Dibner, C., Schibler, U., & Albrecht, U. (2010). The mammalian circadian timing system:  
822 organization and coordination of central and peripheral clocks. *Annu Rev Physiol*, *72*,  
823 517-549. doi:10.1146/annurev-physiol-021909-135821
- 824 Eide, E. J., Woolf, M. F., Kang, H., Woolf, P., Hurst, W., Camacho, F., . . . Virshup, D. M.  
825 (2005). Control of mammalian circadian rhythm by CKIepsilon-regulated  
826 proteasome-mediated PER2 degradation. *Mol Cell Biol*, *25*(7), 2795-2807.  
827 doi:10.1128/MCB.25.7.2795-2807.2005
- 828 Engmann, O., Hortobagyi, T., Pidsley, R., Troakes, C., Bernstein, H. G., Kreutz, M. R., . . .  
829 Giese, K. P. (2011). Schizophrenia is associated with dysregulation of a Cdk5  
830 activator that regulates synaptic protein expression and cognition. *Brain*, *134*(Pt 8),  
831 2408-2421. doi:10.1093/brain/awr155
- 832 Foreman, P. K., & Davis, R. W. (1994). Cloning vectors for the synthesis of epitope-tagged,  
833 truncated and chimeric proteins in *Saccharomyces cerevisiae*. *Gene*, *144*(1), 63-68.
- 834 Garbe, D. S., Fang, Y., Zheng, X., Sowcik, M., Anjum, R., Gygi, S. P., & Sehgal, A. (2013).  
835 Cooperative interaction between phosphorylation sites on PERIOD maintains  
836 circadian period in *Drosophila*. *PLoS Genet*, *9*(9), e1003749.  
837 doi:10.1371/journal.pgen.1003749
- 838 Gilmore, E. C., Ohshima, T., Goffinet, A. M., Kulkarni, A. B., & Herrup, K. (1998). Cyclin-  
839 dependent kinase 5-deficient mice demonstrate novel developmental arrest in cerebral  
840 cortex. *J Neurosci*, *18*(16), 6370-6377.
- 841 Hampp, G., Ripperger, J. A., Houben, T., Schmutz, I., Blex, C., Perreau-Lenz, S., . . .  
842 Albrecht, U. (2008). Regulation of monoamine oxidase A by circadian-clock  
843 components implies clock influence on mood. *Curr Biol*, *18*(9), 678-683.  
844 doi:10.1016/j.cub.2008.04.012
- 845 Hardin, P. E., Hall, J. C., & Rosbash, M. (1990). Feedback of the *Drosophila* period gene  
846 product on circadian cycling of its messenger RNA levels. *Nature*, *343*(6258), 536-  
847 540. doi:10.1038/343536a0
- 848 Hatakeyama, R., Péli-Gulli, M.-P., Hu, Z., Jaquenoud, M., Garcia Osuna, G. M., Sardu, A., . . .  
849 . De Virgilio, C. (2019). Spatially distinct pools of TORC1 balance protein  
850 homeostasis. *Mol Cell*, *73*, in press.
- 851 Hirano, A., Braas, D., Fu, Y. H., & Ptacek, L. J. (2017). FAD Regulates CRYPTOCHROME  
852 Protein Stability and Circadian Clock in Mice. *Cell Rep*, *19*(2), 255-266.  
853 doi:10.1016/j.celrep.2017.03.041
- 854 Hsu, F. N., Chen, M. C., Lin, K. C., Peng, Y. T., Li, P. C., Lin, E., . . . Lin, H. (2013). Cyclin-  
855 dependent kinase 5 modulates STAT3 and androgen receptor activation through  
856 phosphorylation of Ser(7)(2)(7) on STAT3 in prostate cancer cells. *Am J Physiol*  
857 *Endocrinol Metab*, *305*(8), E975-986. doi:10.1152/ajpendo.00615.2012
- 858 Ianes, C., Xu, P., Werz, N., Meng, Z., Henne-Bruns, D., Bischof, J., & Knippschild, U.  
859 (2016). CK1delta activity is modulated by CDK2/E- and CDK5/p35-mediated  
860 phosphorylation. *Amino Acids*, *48*(2), 579-592. doi:10.1007/s00726-015-2114-y
- 861 Jud, C., Schmutz, I., Hampp, G., Oster, H., & Albrecht, U. (2005). A guideline for analyzing  
862 circadian wheel-running behavior in rodents under different lighting conditions. *Biol*  
863 *Proced Online*, *7*, 101-116. doi:10.1251/bpo109
- 864 Kawauchi, T. (2014). Cdk5 regulates multiple cellular events in neural development, function  
865 and disease. *Dev Growth Differ*, *56*(5), 335-348. doi:10.1111/dgd.12138
- 866 Kloss, B., Price, J. L., Saez, L., Blau, J., Rothenfluh, A., Wesley, C. S., & Young, M. W.  
867 (1998). The *Drosophila* clock gene double-time encodes a protein closely related to  
868 human casein kinase Iepsilon. *Cell*, *94*(1), 97-107.

- 869 Kume, K., Zylka, M. J., Sriram, S., Shearman, L. P., Weaver, D. R., Jin, X., . . . Reppert, S.  
870 M. (1999). mCRY1 and mCRY2 are essential components of the negative limb of the  
871 circadian clock feedback loop. *Cell*, *98*(2), 193-205.
- 872 Kwak, Y., Jeong, J., Lee, S., Park, Y. U., Lee, S. A., Han, D. H., . . . Park, S. K. (2013).  
873 Cyclin-dependent kinase 5 (Cdk5) regulates the function of CLOCK protein by direct  
874 phosphorylation. *J Biol Chem*, *288*(52), 36878-36889. doi:10.1074/jbc.M113.494856
- 875 Laemmli, U. K. (1970). Cleavage of structural proteins during the assembly of the head of  
876 bacteriophage T4. *Nature*, *227*(5259), 680-685.
- 877 Langmesser, S., Tallone, T., Bordon, A., Rusconi, S., & Albrecht, U. (2008). Interaction of  
878 circadian clock proteins PER2 and CRY with BMAL1 and CLOCK. *BMC Mol Biol*,  
879 *9*, 41. doi:10.1186/1471-2199-9-41
- 880 Liu, J., Zou, X., Gotoh, T., Brown, A. M., Jiang, L., Wisdom, E. L., . . . Finkielstein, C. V.  
881 (2018). Distinct control of PERIOD2 degradation and circadian rhythms by the  
882 oncoprotein and ubiquitin ligase MDM2. *Sci Signal*, *11*(556).  
883 doi:10.1126/scisignal.aau0715
- 884 Lowrey, P. L., Shimomura, K., Antoch, M. P., Yamazaki, S., Zemenides, P. D., Ralph, M. R.,  
885 . . . Takahashi, J. S. (2000). Positional syntenic cloning and functional  
886 characterization of the mammalian circadian mutation tau. *Science*, *288*(5465), 483-  
887 492.
- 888 Magnone, M. C., Langmesser, S., Bezdek, A. C., Tallone, T., Rusconi, S., & Albrecht, U.  
889 (2014). The Mammalian circadian clock gene per2 modulates cell death in response to  
890 oxidative stress. *Front Neurol*, *5*, 289. doi:10.3389/fneur.2014.00289
- 891 Martinek, S., Inonog, S., Manoukian, A. S., & Young, M. W. (2001). A role for the segment  
892 polarity gene shaggy/GSK-3 in the Drosophila circadian clock. *Cell*, *105*(6), 769-779.
- 893 Measday, V., Baetz, K., Guzzo, J., Yuen, K., Kwok, T., Sheikh, B., . . . Andrews, B. (2005).  
894 Systematic yeast synthetic lethal and synthetic dosage lethal screens identify genes  
895 required for chromosome segregation. *Proc Natl Acad Sci U S A*, *102*(39), 13956-  
896 13961. doi:10.1073/pnas.0503504102
- 897 Meng, Q. J., Logunova, L., Maywood, E. S., Gallego, M., Lebiecki, J., Brown, T. M., . . .  
898 Loudon, A. S. I. (2008). Setting clock speed in mammals: the CK1 epsilon tau  
899 mutation in mice accelerates circadian pacemakers by selectively destabilizing  
900 PERIOD proteins. *Neuron*, *58*(1), 78-88. doi:10.1016/j.neuron.2008.01.019
- 901 Mukherji, A., Kobiita, A., & Chambon, P. (2015). Shifting the feeding of mice to the rest  
902 phase creates metabolic alterations, which, on their own, shift the peripheral circadian  
903 clocks by 12 hours. *Proc Natl Acad Sci U S A*, *112*(48), E6683-6690.  
904 doi:10.1073/pnas.1519735112
- 905 Nam, H. J., Boo, K., Kim, D., Han, D. H., Choe, H. K., Kim, C. R., . . . Baek, S. H. (2014).  
906 Phosphorylation of LSD1 by PKCalpha is crucial for circadian rhythmicity and phase  
907 resetting. *Mol Cell*, *53*(5), 791-805. doi:10.1016/j.molcel.2014.01.028
- 908 Narasimamurthy, R., Hunt S. R., Lu, Y., Fustin, J. M., Okamura, H., Partch, C.L., Foger,  
909 D.B., Kim, J.K., Vishup, D. M. (2018). CK1δ/ε protein kinase primes the PER2  
910 circadian phosphoswitch. *Proc Natl Acad Sci U S A*, *115*(23), 5986-5991.  
911 doi: 10.1073/pnas.1721076115
- 912 Ohshima, T., Ward, J. M., Huh, C. G., Longenecker, G., Veeranna, Pant, H. C., . . . Kulkarni,  
913 A. B. (1996). Targeted disruption of the cyclin-dependent kinase 5 gene results in  
914 abnormal corticogenesis, neuronal pathology and perinatal death. *Proc Natl Acad Sci*  
915 *U S A*, *93*(20), 11173-11178.
- 916 Ollinger, R., Korge, S., Korte, T., Koller, B., Herrmann, A., & Kramer, A. (2014). Dynamics  
917 of the circadian clock protein PERIOD2 in living cells. *J Cell Sci*, *127*(Pt 19), 4322-  
918 4328. doi:10.1242/jcs.156612

- 919 Peterson, D. W., Ando, D. M., Taketa, D. A., Zhou, H., Dahlquist, F. W., & Lew, J. (2010).  
920 No difference in kinetics of tau or histone phosphorylation by CDK5/p25 versus  
921 CDK5/p35 in vitro. *Proc Natl Acad Sci U S A*, *107*(7), 2884-2889.  
922 doi:10.1073/pnas.0912718107
- 923 Ponting, C. P., & Aravind, L. (1997). PAS: a multifunctional domain family comes to light.  
924 *Curr Biol*, *7*(11), R674-677.
- 925 Price, J. L., Blau, J., Rothenfluh, A., Abodeely, M., Kloss, B., & Young, M. W. (1998).  
926 double-time is a novel Drosophila clock gene that regulates PERIOD protein  
927 accumulation. *Cell*, *94*(1), 83-95.
- 928 Roenneberg, T., & Mrosovsky, M. (2016). The Circadian Clock and Human Health. *Curr Biol*,  
929 *26*(10), R432-443. doi:10.1016/j.cub.2016.04.011
- 930 Rosbash, M. (2009). The implications of multiple circadian clock origins. *PLoS Biol*, *7*(3),  
931 e62. doi:10.1371/journal.pbio.1000062
- 932 Roybal, K., Theobald, D., Graham, A., DiNieri, J. A., Russo, S. J., Krishnan, V., . . .  
933 McClung, C. A. (2007). Mania-like behavior induced by disruption of CLOCK. *Proc*  
934 *Natl Acad Sci U S A*, *104*(15), 6406-6411. doi:10.1073/pnas.0609625104
- 935 Schmutz, I., Ripperger, J. A., Baeriswyl-Aebischer, S., & Albrecht, U. (2010). The  
936 mammalian clock component PERIOD2 coordinates circadian output by interaction  
937 with nuclear receptors. *Genes Dev*, *24*(4), 345-357. doi:10.1101/gad.564110
- 938 Schmutz, I., Wendt, S., Schnell, A., Kramer, A., Mansuy, I. M., & Albrecht, U. (2011).  
939 Protein phosphatase 1 (PP1) is a post-translational regulator of the mammalian  
940 circadian clock. *PLoS One*, *6*(6), e21325. doi:10.1371/journal.pone.0021325
- 941 Schnell, A., Chappuis, S., Schmutz, I., Brai, E., Ripperger, J. A., Schaad, O., . . . Albrecht, U.  
942 (2014). The nuclear receptor REV-ERB $\alpha$  regulates Fabp7 and modulates adult  
943 hippocampal neurogenesis. *PLoS One*, *9*(6), e99883.  
944 doi:10.1371/journal.pone.0099883
- 945 Shah, K., & Lahiri, D. K. (2014). Cdk5 activity in the brain - multiple paths of regulation. *J*  
946 *Cell Sci*, *127*(Pt 11), 2391-2400. doi:10.1242/jcs.147553
- 947 Sharifpoor, S., van Dyk, D., Costanzo, M., Baryshnikova, A., Friesen, H., Douglas, A. C., . . .  
948 Andrews, B. J. (2012). Functional wiring of the yeast kinome revealed by global  
949 analysis of genetic network motifs. *Genome Res*, *22*(4), 791-801.  
950 doi:10.1101/gr.129213.111
- 951 Sharma, P., Sharma, M., Amin, N. D., Albers, R. W., & Pant, H. C. (1999). Regulation of  
952 cyclin-dependent kinase 5 catalytic activity by phosphorylation. *Proc Natl Acad Sci U*  
953 *S A*, *96*(20), 11156-11160.
- 954 Sopko, R., Huang, D., Preston, N., Chua, G., Papp, B., Kafadar, K., . . . Andrews, B. (2006).  
955 Mapping pathways and phenotypes by systematic gene overexpression. *Mol Cell*,  
956 *21*(3), 319-330. doi:10.1016/j.molcel.2005.12.011
- 957 Takahashi, J. S. (2017). Transcriptional architecture of the mammalian circadian clock. *Nat*  
958 *Rev Genet*, *18*(3), 164-179. doi:10.1038/nrg.2016.150
- 959 Tang, D., Yeung, J., Lee, K. Y., Matsushita, M., Matsui, H., Tomizawa, K., . . . Wang, J. H.  
960 (1995). An isoform of the neuronal cyclin-dependent kinase 5 (Cdk5) activator. *J Biol*  
961 *Chem*, *270*(45), 26897-26903.
- 962 Toh, K. L., Jones, C. R., He, Y., Eide, E. J., Hinze, W. A., Virshup, D. M., . . . Fu, Y. H.  
963 (2001). An hPer2 phosphorylation site mutation in familial advanced sleep phase  
964 syndrome. *Science*, *291*(5506), 1040-1043.
- 965 Tong, A. H., Evangelista, M., Parsons, A. B., Xu, H., Bader, G. D., Page, N., . . . Boone, C.  
966 (2001). Systematic genetic analysis with ordered arrays of yeast deletion mutants.  
967 *Science*, *294*(5550), 2364-2368. doi:10.1126/science.1065810

- 968 Tsai, L. H., Delalle, I., Caviness, V. S., Jr., Chae, T., & Harlow, E. (1994). p35 is a neural-  
969 specific regulatory subunit of cyclin-dependent kinase 5. *Nature*, *371*(6496), 419-423.  
970 doi:10.1038/371419a0
- 971 van der Horst, G. T., Muijtjens, M., Kobayashi, K., Takano, R., Kanno, S., Takao, M., . . .  
972 Yasui, A. (1999). Mammalian Cry1 and Cry2 are essential for maintenance of  
973 circadian rhythms. *Nature*, *398*(6728), 627-630. doi:10.1038/19323
- 974 Vanselow, K., Vanselow, J. T., Westermarck, P. O., Reischl, S., Maier, B., Korte, T., . . .  
975 Kramer, A. (2006). Differential effects of PER2 phosphorylation: molecular basis for  
976 the human familial advanced sleep phase syndrome (FASPS). *Genes Dev*, *20*(19),  
977 2660-2672. doi:10.1101/gad.397006
- 978 Wisniewski, J. R., Zougman, A., Nagaraj, N., & Mann, M. (2009). Universal sample  
979 preparation method for proteome analysis. *Nat Methods*, *6*(5), 359-362.  
980 doi:10.1038/nmeth.1322
- 981 Xu, H., Gustafson, C. L., Sammons, P. J., Khan, S. K., Parsley, N. C., Ramanathan, C., . . .  
982 Partch, C. L. (2015). Cryptochrome 1 regulates the circadian clock through dynamic  
983 interactions with the BMAL1 C terminus. *Nat Struct Mol Biol*, *22*(6), 476-484.  
984 doi:10.1038/nsmb.3018
- 985 Xu, Y., Toh, K. L., Jones, C. R., Shin, J. Y., Fu, Y. H., & Ptacek, L. J. (2007). Modeling of a  
986 human circadian mutation yields insights into clock regulation by PER2. *Cell*, *128*(1),  
987 59-70. doi:10.1016/j.cell.2006.11.043
- 988 Yagita, K., Yamaguchi, S., Tamanini, F., van Der Horst, G. T., Hoeijmakers, J. H., Yasui, A.,  
989 . . . Okamura, H. (2000). Dimerization and nuclear entry of mPER proteins in  
990 mammalian cells. *Genes Dev*, *14*(11), 1353-1363.
- 991 Yamazaki, S., Maruyama, M., Cagampang, F. R., & Inouye, S. T. (1994). Circadian  
992 fluctuations of cAMP content in the suprachiasmatic nucleus and the anterior  
993 hypothalamus of the rat. *Brain Res*, *651*(1-2), 329-331.
- 994 Ye, R., Selby, C. P., Chiou, Y. Y., Ozkan-Dagliyan, I., Gaddameedhi, S., Sancar, A. (2014).  
995 Dual modes of CLOCK:BMAL1 inhibition mediated by Cryptochrome and Period  
996 proteins in the mammalian circadian clock. *Genes Dev* *28*(18), 1989-1998, doi:  
997 10.1101/gad.249417.114
- 998 Zarei, M., Sprenger, A., Rackiewicz, M., & Dengjel, J. (2016). Fast and easy phosphopeptide  
999 fractionation by combinatorial ERLIC-SCX solid-phase extraction for in-depth  
1000 phosphoproteome analysis. *Nat Protoc*, *11*(1), 37-45. doi:10.1038/nprot.2015.134
- 1001 Zheng, B., Larkin, D. W., Albrecht, U., Sun, Z. S., Sage, M., Eichele, G., . . . Bradley, A.  
1002 (1999). The mPer2 gene encodes a functional component of the mammalian circadian  
1003 clock. *Nature*, *400*(6740), 169-173. doi:10.1038/22118
- 1004 Zhu, W. L., Shi, H. S., Wang, S. J., Xu, C. M., Jiang, W. G., Wang, X., . . . Lu, L. (2012).  
1005 Increased Cdk5/p35 activity in the dentate gyrus mediates depressive-like behaviour  
1006 in rats. *Int J Neuropsychopharmacol*, *15*(6), 795-809.  
1007 doi:10.1017/S1461145711000915  
1008

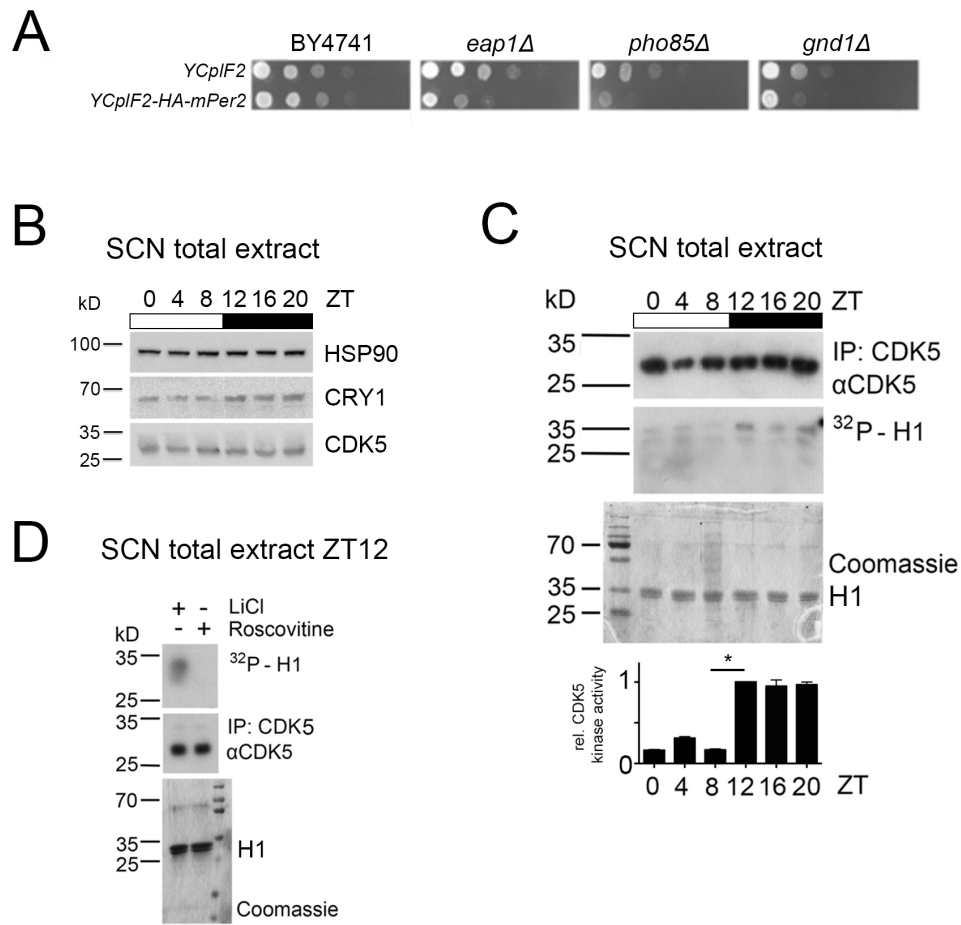

Fig.1

1009

1010

1011 **Figure 1: CDK5 intersects with PER2 and has diurnal activity in the SCN.**

1012 (A) Loss of *Eap1*, *Gnd1*, or *Pho85* compromises growth of PER2-overproducing yeast cells.  
1013 The yeast mutants *eap1Δ*, *gnd1Δ*, and *pho85Δ* were identified in a synthetic dosage lethal  
1014 screen as detailed under Methods. Wild-type (BY4741) as well as *eap1Δ*, *gnd1Δ*, and *pho85Δ*  
1015 mutant cells carrying the control plasmid (YCpIF2) or the YPpIF2-*mPer2* plasmid (that drives  
1016 expression of mouse PER2 from a galactose-inducible promoter) were pre-grown on glucose-  
1017 containing SD-Leu media (to an OD<sub>600</sub> of 2.0), spotted (in 10-fold serial dilutions) on raffinose  
1018 and galactose-containing SD-Raf/Gal-Leu plates, and grown for 3 days at 30°C. (B)  
1019 Immunoblot was performed on SCN extracts around the clock. SCN from seven animals were  
1020 pooled at each indicated ZT between ZT0-20. Protein levels of CDK5, CRY1, and HSP90 were  
1021 analyzed by Western Blot. (C) Diurnal activity of CDK5 was measured by an *in vitro* kinase  
1022 assay. CDK5 was immunoprecipitated at each same time point between ZT0 and ZT20, and  
1023 half of the immunoprecipitated material was used for performing an *in vitro* kinase assay using  
1024 histone H1 (autoradiography, middle panel), whereas the other half was used to quantify the  
1025 immunoprecipitated CDK5 (upper panel). Coomassie staining shows loading of the substrate  
1026 (H1). Bottom panel: Quantification of 3 independent experiments (mean ± SEM). 1-way  
1027 ANOVA with Bonferroni's post-test, \*: p<0.001. (D) The *in vitro* kinase assay was performed  
1028 with SCN extracts at ZT12, and either LiCl (GSK3β inhibitor) or 34 μM roscovitine (CDK5  
1029 inhibitor). Histone H1 phosphorylation could not be detected with roscovitine treatment,  
1030 showing the specificity of H1 phosphorylation by CDK5.



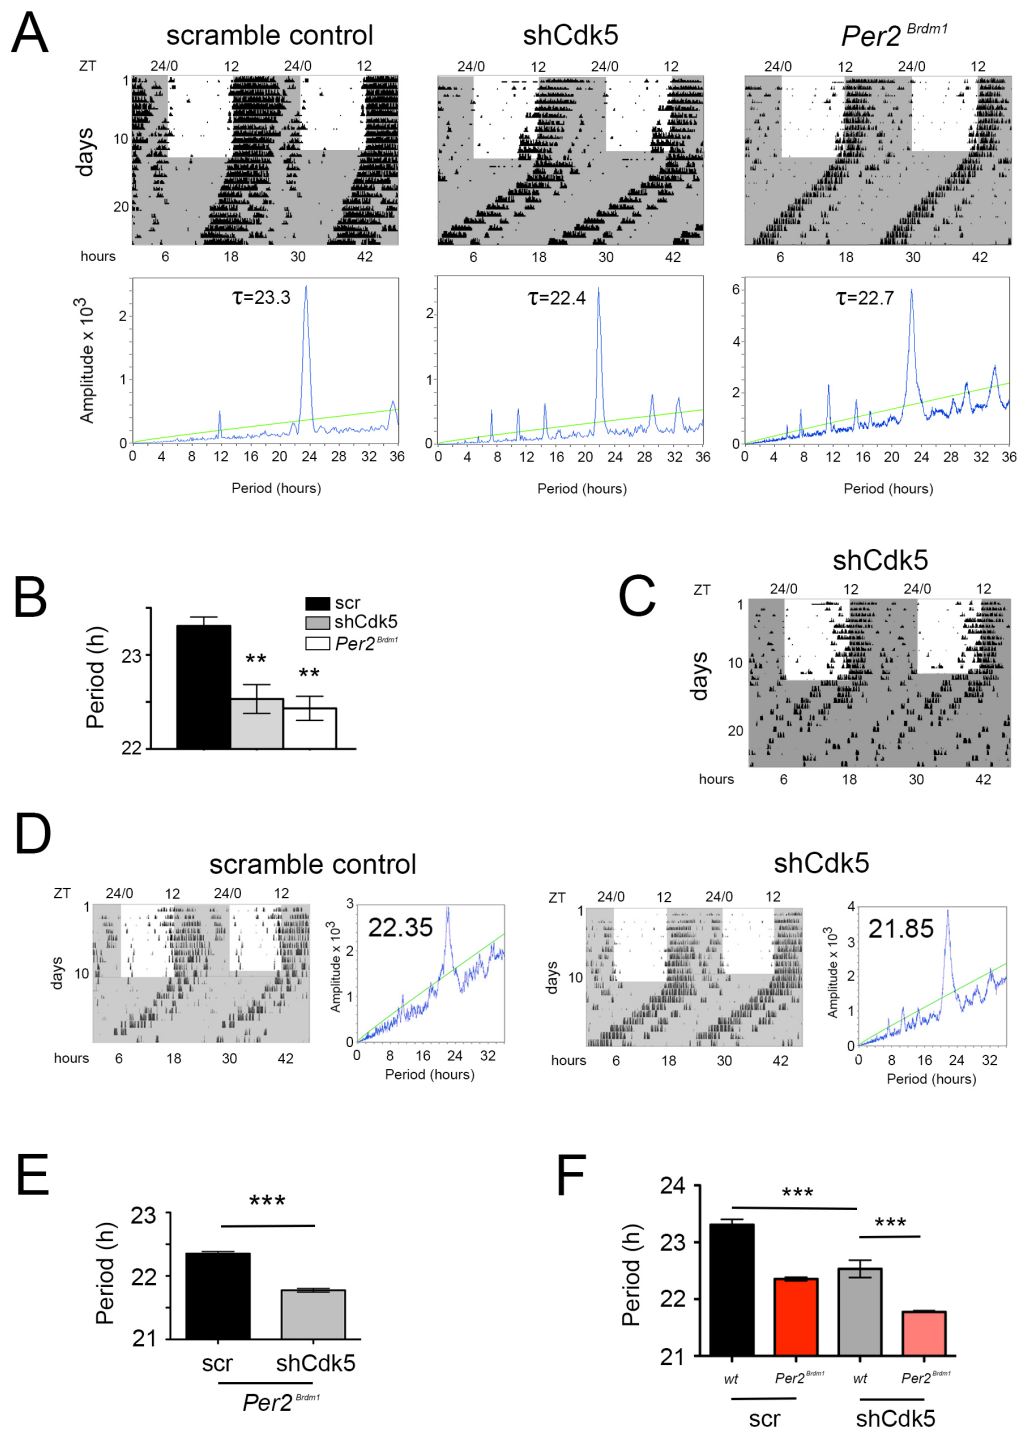

Fig.2

1031

1032

1033 **Figure 2: CDK5 affects the circadian clock.**

1034 (A) Wheel-running activity of mice (black bins) infected with AAV expressing scrambled  
1035 control shRNA, or shCdk5, and an animal with a deletion in the *Per2* gene (*Per2<sup>Brdm1</sup>*). The  
1036 actograms are double plotted displaying in one row and below two consecutive days. The  
1037 locomotor activity was confined to the dark period (shaded in grey), while under LD the mice  
1038 displayed low activity during the light phase (white area). Under DD (continuous grey shaded  
1039 area) the shCdk5 and *Per2<sup>Brdm1</sup>* animals show earlier onset of activity each day compared with  
1040 the control animals. The  $\chi^2$ -periodogram analysis for each of the animals is shown below the  
1041 corresponding actogram to determine the period length ( $\tau$ ). (B) Quantification of the circadian  
1042 period: 23.3 $\pm$ 0.1 h for the control mice (n=6, black bar), 22.5 $\pm$ 0.2 h for shCdk5 injected mice  
1043 (n=6, grey bar), and 22.4 $\pm$ 0.1 h for *Per2<sup>Brdm1</sup>* mice (n=4, white bar), (mean $\pm$ SEM). 1-way  
1044 ANOVA with Bonferroni's post-test, \*\*p<0.01. (C) In some cases, mice in which *Cdk5* was  
1045 silenced in the SCN became arrhythmic. (D) Wheel-running activity (black bins) of *Per2<sup>Brdm1</sup>*  
1046 mice infected with AAV expressing scrambled control shRNA (scr), or shRNA against Cdk5  
1047 (shCdk5). The actograms are double plotted displaying in one row and below two consecutive  
1048 days. The dark shaded area indicates darkness during which the free-running period was  
1049 determined. To the right of each actogram the corresponding  $\chi^2$ -periodogram is shown. The  
1050 number in each periodogram indicates the period of the animal. (E) Quantification of the  
1051 circadian period: 22.35 $\pm$ 0.03 h for the scrambled *Per2<sup>Brdm1</sup>* (n=3, black bar) and 21.77 $\pm$ 0.03 h  
1052 for the shCdk5 injected *Per2<sup>Brdm1</sup>* mice (n=5, grey bar). Values are the mean $\pm$ SEM, t-test,  
1053 \*\*\*p<0.0001. (F) 1-way ANOVA test on wild-type and *Per2<sup>Brdm1</sup>* animals infected with AAV  
1054 expressing scrambled control shRNA (scr), or shRNA against Cdk5 (shCdk5). N = 3-6 animals,  
1055 error bars are the mean $\pm$ SEM, Bonferroni multiple comparisons test, \*\*\*p<0.001.

1056

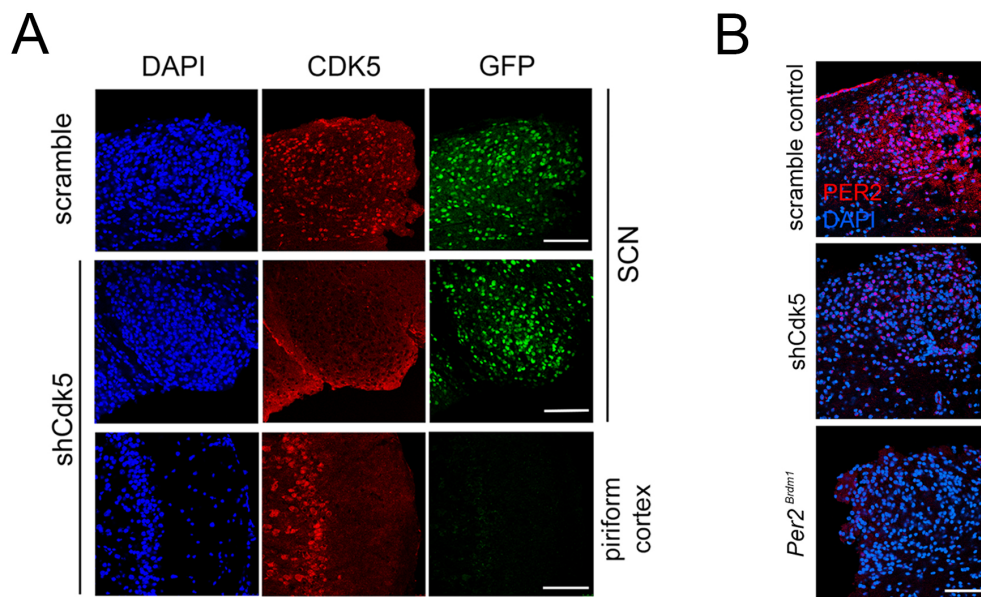

Fig. 3

1057

1058

1059 **Figure 3: Immunohistochemistry in the SCN of control and shCdk5 silenced wild type**  
1060 **and *Per2<sup>Brdm1</sup>* mice.**

1061 (A) Representative sections of the SCN region after injection of AAVs carrying either  
1062 scrambled shRNA, or shCdk5. Slices were stained with DAPI (blue), or anti-GFP (green) and  
1063 anti-CDK5 (red) antibodies. GFP was used as marker for those cells infected by the virus.  
1064 CDK5 was efficiently down-regulated in the SCN by shCdk5 (red panels) but not by scrambled  
1065 shRNA, which was as efficiently delivered as shCDK5. As control, the non-infected piriform  
1066 cortex from the same animal in which *Cdk5* was silenced is shown. Scale bar: 200  $\mu$ m. (B)  
1067 Analysis of PER2 expression in sections of the SCN of scrambled shRNA, shCdk5 and  
1068 *Per2<sup>Brdm1</sup>* mice. Silencing of *Cdk5* leads to lack of PER2 (red) compared with control at ZT12,  
1069 which almost resembles the situation observed in *Per2<sup>Brdm1</sup>* animals. Blue color: DAPI staining  
1070 for cell nuclei. Scale bar: 200  $\mu$ m.

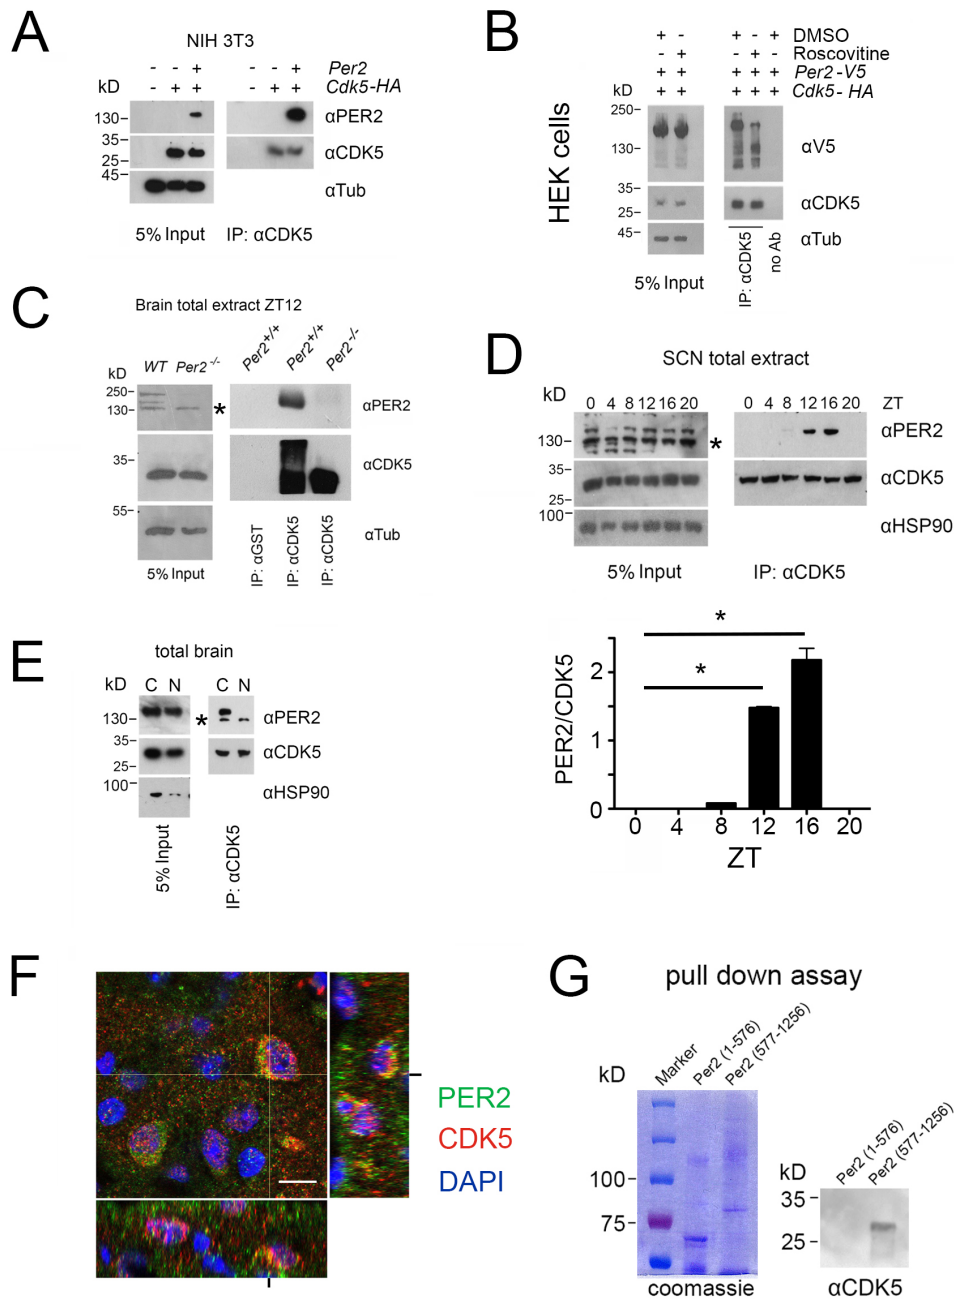

Fig. 4

1071

1072

1073 **Figure 4: PER2 interacts with CDK5 in a temporal fashion in the cytoplasm.**

1074 (A) Overexpression of PER2 and CDK5-HA in NIH 3T3 cells and subsequent  
1075 immunoprecipitation (IP) using an anti-CDK5 antibody. The left panel shows 5% of the input  
1076 and the right panel co-precipitation of PER2 with CDK5. (B) Overexpression of PER2-V5 and  
1077 CDK5-HA in HEK293 cells in presence or absence of 34  $\mu$ M roscovitine (CDK5 inhibitor)  
1078 and DMSO (solvent). Left panel shows 5% of the input and the right panel the  
1079 immunoprecipitation with anti-CDK5 or without antibody. (C) Immunoprecipitation (IP) of  
1080 PER2 and CDK5 from total mouse brain extract collected at ZT12. Left panel shows the input.  
1081 The right panel depicts co-immunoprecipitation of PER2 and CDK5 using either anti-CDK5  
1082 antibody or anti-GST antibody for precipitation. The middle lane shows PER2-CDK5 co-  
1083 immunoprecipitation in control animals (*Per2<sup>+/+</sup>*) but not in *Per2<sup>-/-</sup>* mice illustrating the  
1084 specificity of the PER2-CDK5 interaction. The \* in the blot indicates unspecific signal. (D)  
1085 Temporal profile of the PER2-CDK5 interaction in total extracts from SCN tissue around the  
1086 clock. Input was analyzed by immunoblot using anti-CDK5, anti-PER2, and anti-HSP90  
1087 antibodies (left panel). CDK5 co-immunoprecipitated PER2 in a diurnal fashion with a peak  
1088 between ZT12 and ZT16. The statistical analysis of the PER2/CDK5 signal around the clock  
1089 is shown below (1-way ANOVA with Bonferroni's post-test, n=3, \*p<0.0001, values are mean  
1090  $\pm$  SEM). \* in the blot indicates unspecific signal. (E) Immunoprecipitation of PER2 with CDK5  
1091 from cytoplasmic and nuclear brain extracts collected at ZT12. The left panel shows the input  
1092 and the right panel co-IP of PER2 and CDK5, which occurs only in the cytoplasm but not in  
1093 the nucleus. The smaller band detected by the anti-PER2 antibody depicts an unspecific band  
1094 that is smaller than PER2. \* in the blot indicates unspecific signal. (F) Slices from the SCN  
1095 obtained at ZT12 were immunostained with PER2 antibody (green), CDK5 (red), and nuclei  
1096 were marked with DAPI (blue). Co-localization of the two proteins results in the yellow color.  
1097 Scale bar: 10  $\mu$ m. The z-stacks right and below the micrograph confirm co-localization of

1098 PER2 and CDK5 (yellow). (G) Purification of the N-terminal half of PER2 (1-576) or the C-  
1099 terminal half (577-1256) (left panel, coomassie). CDK5-His was pulled down by both  
1100 recombinant PER2 attached to the glutathione resin, but only the C-terminal was able to retain  
1101 CDK5 (immunoblot using anti-His antibody, right panel).

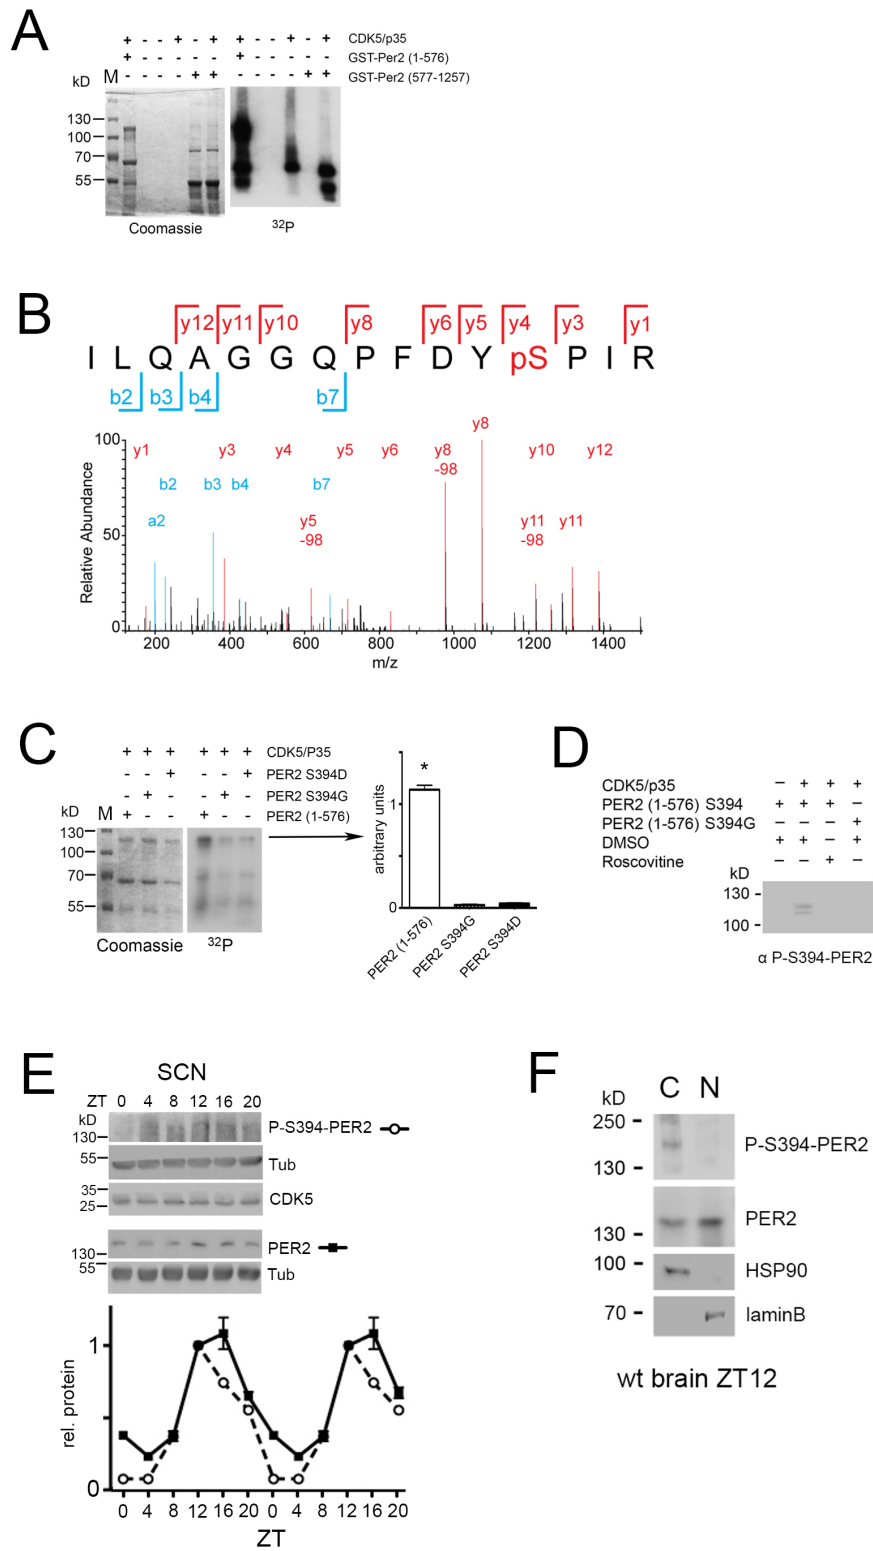

Fig. 5

1102

1103



1104 **Figure 5: CDK5 phosphorylates PER2 at S394**

1105 (A) An *in vitro* kinase assay was performed using recombinant CDK5/p35 and either GST-  
1106 PER2 1-576 or GST-PER2 577-1256 as substrate. The samples were subjected to 10% SDS  
1107 page (Coomassie, left panel) and the phosphorylation of PER2 was detected by  
1108 autoradiography in order to visualize <sup>32</sup>P-labeled proteins (right panel). CDK5 phosphorylates  
1109 the N-terminal half (1-576) of a GST-PER2 fusion protein whereas the C-terminal half (577-  
1110 1257) is not phosphorylated. The signal for CDK5/p35 alone indicates CDK5 auto-  
1111 phosphorylation seen in all lanes when CDK5 is present. (B) Annotated mass spectrum of the  
1112 tryptic peptide PER2<sup>383-397</sup> ILQAGGQPF<sup>Y</sup>pSPIR containing the phosphorylated residue  
1113 S394. The red color depicts the y-ion series (1-12) and blue the b-ion series (2-7, a<sub>2</sub>); y<sub>5</sub>-98,  
1114 y<sub>8</sub>-98, y<sub>11</sub>-98 show the de-phosphorylated ions. (C) *In vitro* kinase assay was performed as in  
1115 (A). The putative phosphorylation site was mutated to aspartic acid (S394D) or glycine  
1116 (S394G). Both mutations abrogated the CDK5-mediated phosphorylation. Coomassie staining  
1117 reveals equal expression of the GST-PER2 fragments. The bar diagram at the right shows the  
1118 quantification of 3 experiments. 1-way-ANOVA with Bonferroni's post-test, \*: p<0.001 (D)  
1119 The monoclonal antibody produced against P-S394-PER2 does recognizes PER2 (1-576) S394  
1120 phosphorylation mediated by CDK5/p35 in presence but not in absence of the kinase or when  
1121 CDK5 is inactivated by roscovitine. This antibody does not recognize the S394G mutated form  
1122 even in presence of CDK5/p35. (E) Temporal profile of P-S394-PER2 and total PER2 in SCN  
1123 tissue. Upper panels show Western blots of the corresponding proteins indicated on the right.  
1124 Below the quantification of 3 experiments is shown, in which the value at ZT12 of PER2 has  
1125 been set to 1. The data were double plotted. Values are the mean±SEM. 2-way ANOVA with  
1126 Bonferroni's multiple comparisons revealed that the two curves are significantly different with  
1127 p < 0.0001, F=93.65, DF<sub>n</sub>=1, DF<sub>d</sub>=48. (F) Subcellular localization of P-S394-PER2. Total  
1128 wild-type mouse brain extracts were separated into cytoplasmic (HSP90 positive) and nuclear

1129 (laminB positive) fractions. Phosphorylated PER2 was predominantly detected in the  
1130 cytoplasm with the P-S394-PER2 antibody, whereas the general PER2 antibody detected PER2  
1131 in both compartments with higher amounts in the nuclear fraction.

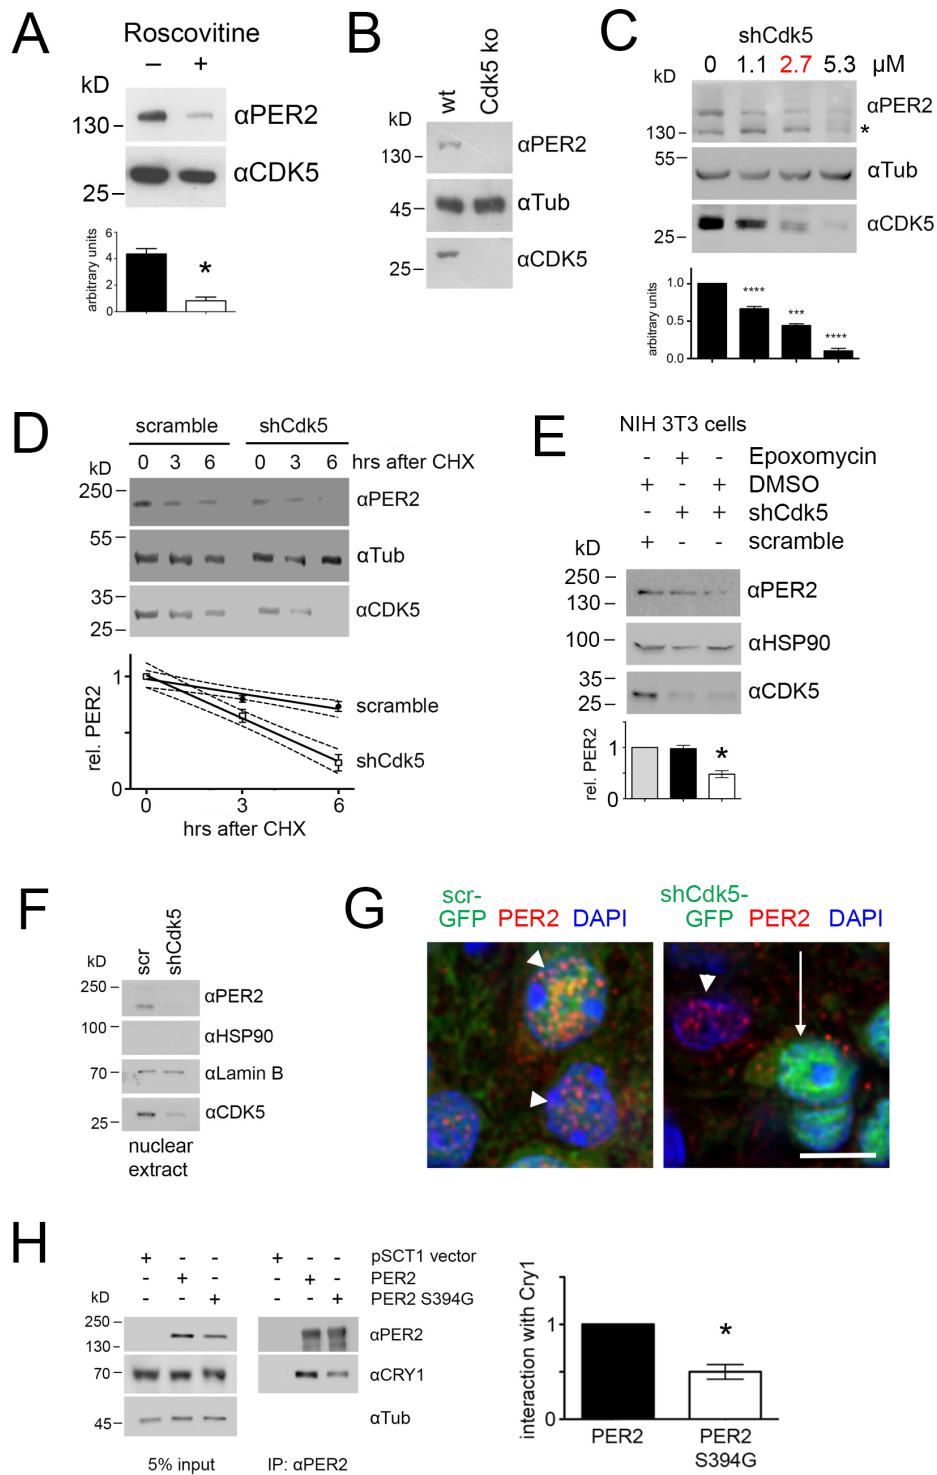

Fig. 6

1132

1133

1134 **Figure 6: CDK5 affects PER2 stability and nuclear localization**

1135 (A) Western blot of NIH 3T3 cell extracts with and without roscovitine treatment. When  
1136 roscovitine inhibited CDK5, less PER2 protein was detected in cell extracts. The bar diagram  
1137 below shows values (mean±SEM) of 3 experiments with significant differences between  
1138 roscovitine treated and untreated cells, t-test, \* $p < 0.001$ . (B) CRISPR/Cas9-mediated knockout  
1139 of *Cdk5* in NIH 3T3 cells. Western blot shows absence of PER2 in cells when *Cdk5* is deleted.  
1140 (C) Titration of CDK5 knock-down as revealed by Western blotting. PER2 levels decreased  
1141 proportionally to increasing amounts of shCdk5. 2.7  $\mu\text{M}$  of shCdk5 (red) was used for  
1142 subsequent experiments. The value without shCdk5 was set to 1. 1-way ANOVA with  
1143 Bonferroni post-test,  $n=4$ , \*\*\* $p < 0.001$ , \*\*\*\* $p < 0.0001$ , mean±SD. The \* in the blot indicates  
1144 unspecific signal. (D) Temporal profile of protein abundance in NIH 3T3 cells 0, 3 and 6 h  
1145 after inhibition of protein synthesis by 100  $\mu\text{M}$  cycloheximide (CHX) in presence of scrambled  
1146 shRNA, or shCdk5, respectively (2.7  $\mu\text{M}$  of the respective shRNA was used). The diagram  
1147 below shows quantification of PER2 protein over time. Linear regression with 95% confidence  
1148 intervals (hatched lines) indicates that knock-down of *Cdk5* leads to less stable PER2 (shCdk5  
1149  $t_{1/2}=4\text{h}$ , scr  $t_{1/2}=11\text{h}$ ). 2-way ANOVA with Bonferroni's post-test revealed that the two curves  
1150 are significantly different,  $n=3$ ,  $p < 0.01$ ,  $F=24.53$ ,  $DF_n=1$ ,  $DF_d=4$ . (E) Inhibition of the  
1151 proteasome by epoxomycin in cells with shCdk5 leads to amounts of PER2 that are higher  
1152 compared with the levels without epoxomycin treatment and are comparable to the levels  
1153 observed in cells without *Cdk5* knockdown. Diagram below displays the quantification of 3  
1154 experiments. Scrambled shRNA values were set to 1. 1-way ANOVA with Bonferroni's post-  
1155 test shows no significant reduction of PER2 in shCdk5 cells in presence of epoxomycin, but  
1156 significantly lower values in absence of epoxomycin when compared with scrambled shRNA  
1157 treatment. 1-way ANOVA with Bonferroni's post-test,  $n=3$ ,  $p < 0.001$ . (F) PER2 abundance in  
1158 nuclear extracts of NIH 3T3 cells. Knockdown of *Cdk5* reduces PER2 levels in the nucleus as

1159 revealed by Western blotting. HSP90 = cytosolic marker, LaminB = nuclear maker. (G)  
1160 Immunofluorescence of PER2 (red) at ZT12 in mouse SCN sections after infection with AAV  
1161 (green) expressing scrambled shRNA (left panel), or shCdk5 (right panel). Nuclei are  
1162 visualized by DAPI staining (blue). PER2 can only be observed in the nucleus in presence  
1163 (white arrow heads) but not in absence of CDK5 (white arrow). Scale bar = 7.5  $\mu$ m. (H) Co-  
1164 immunoprecipitation of CRY1 by PER2 in NIH 3T3 cells. Substitution of S394 to G in PER2  
1165 reduces the levels of co-precipitated CRY1 (right panel). The left panel shows the input. The  
1166 bar diagram on the right displays the quantification of 3 experiments, where the amount of  
1167 precipitated CRY1 by PER2 is set to 1. Paired t-test reveals a significant difference between  
1168 the amounts of CRY1 precipitated by PER2 and the S394G PER2 mutation,  $n = 3$ ,  $*p < 0.05$ ,  
1169  $\text{mean} \pm \text{SD}$ .  
1170

1171

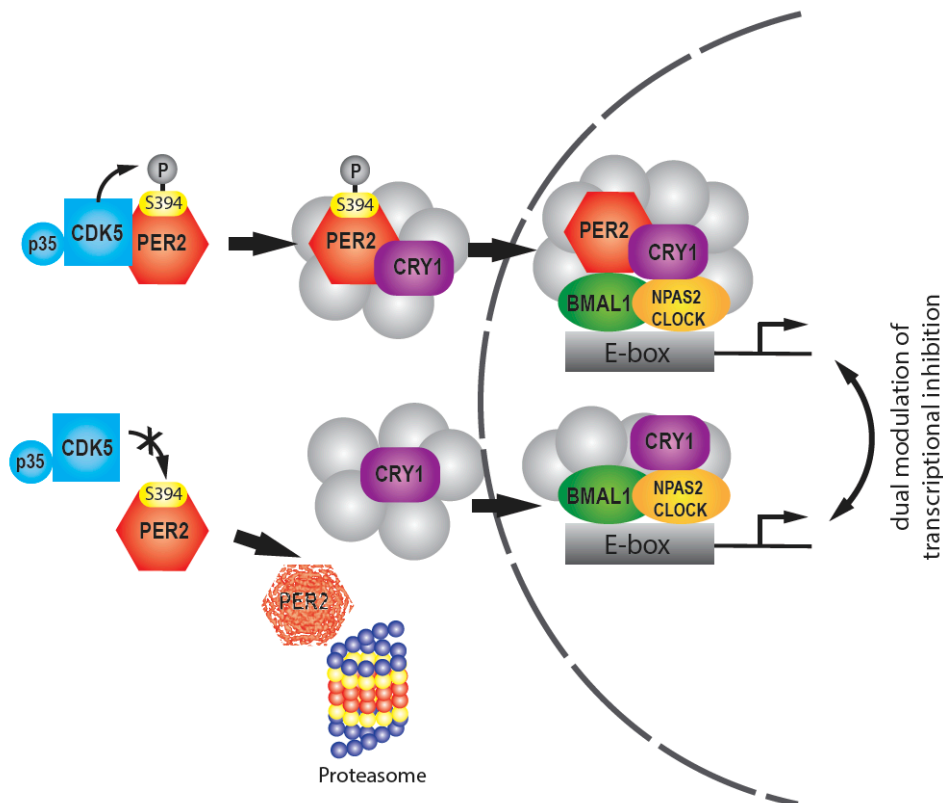

1172

1173

1174

1175 **Figure 7 Model showing the regulation of PER2 by CDK5**

1176 The upper row illustrates phosphorylation of PER2 at S394 by CDK5 that subsequently favors

1177 interaction with CRY1 and leads to transport into the nucleus, where the PER2/CRY1 complex

1178 inhibits BMAL1/NPAS2 (or in the periphery CLOCK)-driven transcriptional activation. The

1179 lower part illustrates that inhibition of CDK5 leads to a lack of S394 PER2 phosphorylation,

1180 which renders the PER2 protein more prone to degradation by the proteasome. CRY1 does not

1181 form a complex with PER2 and hence PER2 is not transported into the nucleus. CRY1 enters

1182 the nucleus independently and can inhibit the BMAL1:NPAS2 (or in the periphery CLOCK)

1183 transcriptional complex. This model is consistent with the dual modulation of transcriptional

1184 inhibition (Ye et al., 2014; H. Xu et al., 2015). Transcriptional inhibition is modulated in an

CDK5 regulates the circadian clock

Brenna et al.

1185 intricate unknown manner by various additional factors (grey) (Aryal et al., 2017) that may be

1186 cell type specific.

1187

1188 Supplemental figures

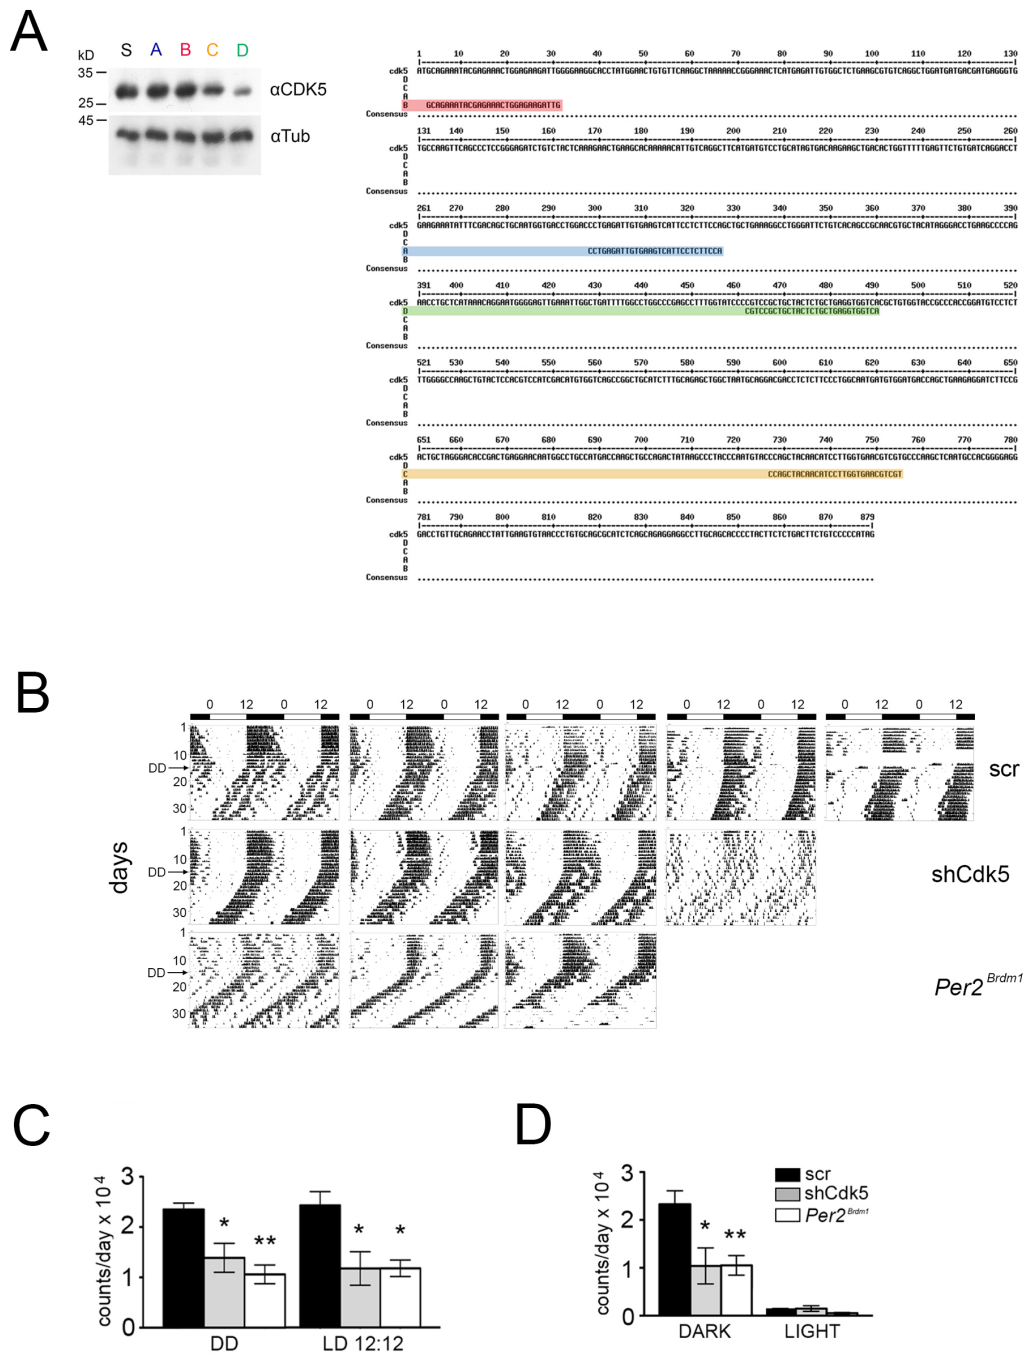

Fig. S1



1190 **Figure S1: Molecular and behavioral investigation of CDK5 silencing activity in cells and**  
1191 **mice.**

1192 (A) Western blot using NIH 3T3 cell extracts transfected with different shRNAs against *Cdk5*.  
1193 All shRNAs were mapped to the *Cdk5* sequence. The Western blot reveals that the shRNA D  
1194 (nucleotides 462 to 490) showed the best silencing activity. (B) Wheel-running activity of mice  
1195 infected with AAV expressing scrambled shRNA or shCdk5 and animals with a deletion in the  
1196 *Per2* gene (*Per2<sup>Brdm1</sup>*) used for the statistical analysis in Fig. 1B and Fig. S1 B, C. (C) shCdk5  
1197 (13878±2877 counts/day, n=6) and *Per2<sup>Brdm1</sup>* mice (10598±1856 counts/day, n=4) in DD when  
1198 compared with the control animals (23478±1277 counts/day, n=6) as well as in LD conditions:  
1199 shCdk5 (11894±3379 counts/day, n=6), *Per2<sup>Brdm1</sup>* mice (11919±1665 counts/day, n=4) and  
1200 control animals (24577±2787 counts/day, n=6). (D) Dark: scramble (23276±2817 counts/day,  
1201 n=6), shCdk5 (10399±3764 counts/day, n=6), *Per2<sup>Brdm1</sup>* mice (10521±2052 counts/day, n=4).  
1202 Light: scramble (1301±223 counts/day, n=6), shCdk5 (1495±582 counts/day, n=6), *Per2<sup>Brdm1</sup>*  
1203 mice (528±150 counts/day, n=4). (Mean±SEM). 1-way ANOVA with Bonferroni post-test,  
1204 \*\*p<0.01, \*p<0.05.

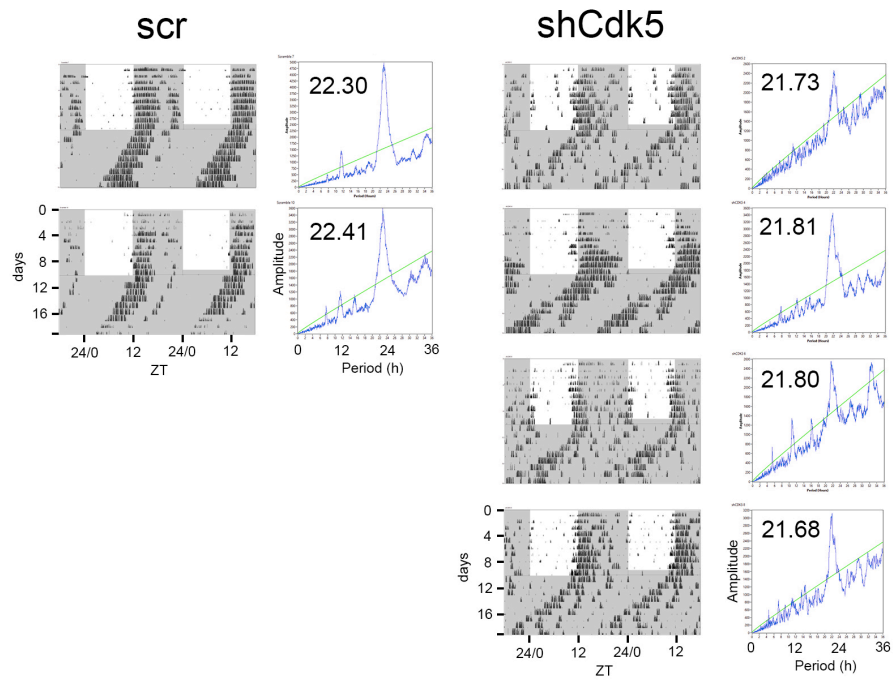

Fig. S2

1205

1206

1207 **Figure S2: Knockdown of Cdk5 in *Per2<sup>Brdm1</sup>* mutant mice.**

1208 Wheel-running activity (black bins) of *Per2<sup>Brdm1</sup>* mice infected with AAV expressing  
1209 scrambled control shRNA (scr), or shRNA against Cdk5 (shCdk5). The actograms are double  
1210 plotted displaying in one row and below two consecutive days. The dark shaded area indicates  
1211 darkness during which the free-running period was determined. To the right of each actogram  
1212 the corresponding  $\chi^2$ -periodogram is shown. The number in each periodogram indicates the  
1213 period of the animal.

1214

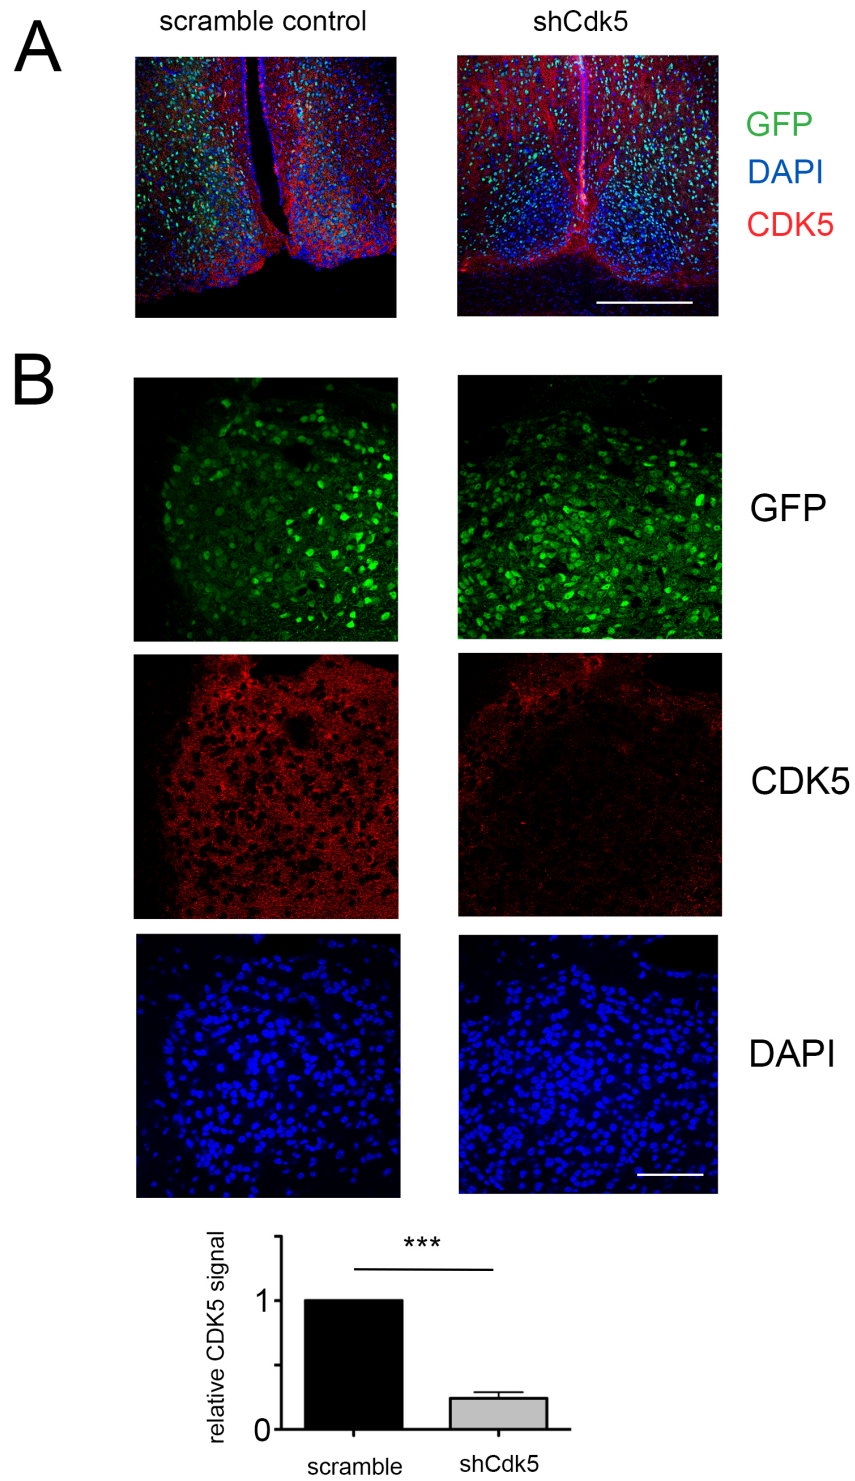

Fig. S3

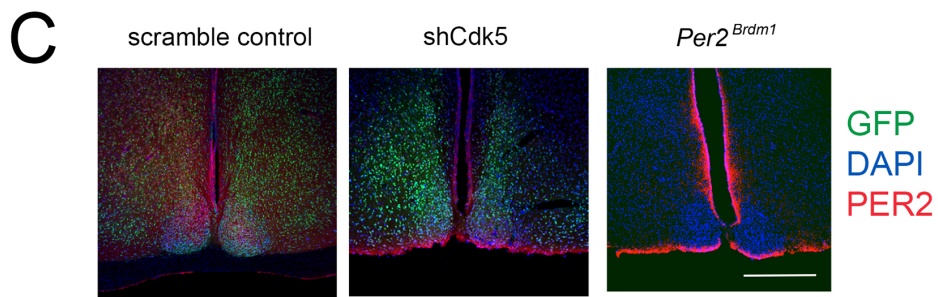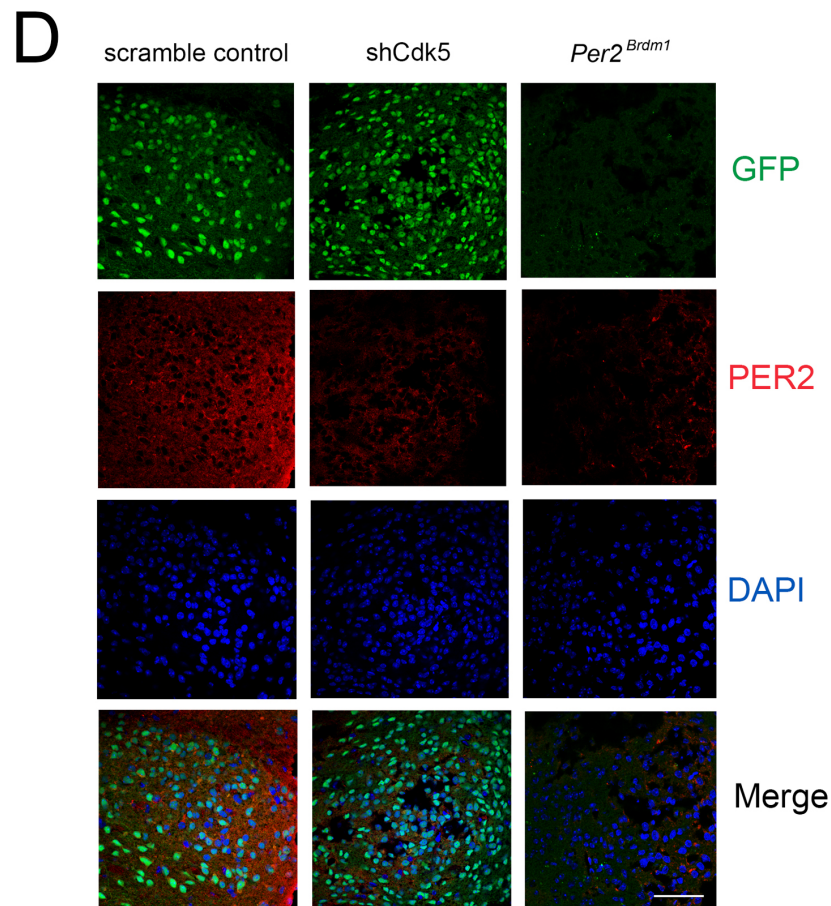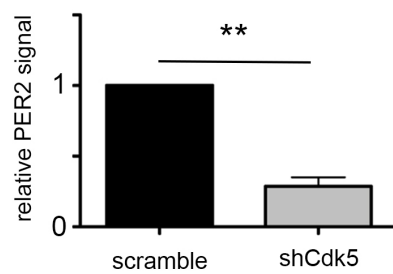

Fig. S3

1217 **Figure S3: Statistical evaluation of the CDK5 and PER2 signals in the SCN with and**  
1218 **without Cdk5 knock-down.**

1219 (A) Representative brain sections of normal mice containing the SCN region after injection of  
1220 AAVs carrying either scrambled shRNA or shCdk5. GFP was used as a marker to illustrate the  
1221 infected region including the SCN. The CDK5 signal (red) is down regulated in the SCN region  
1222 of AAV shCdk5 injected brain. Scale bar 500  $\mu$ m. (B) Higher magnification of representative  
1223 sections of the SCN after AAVs carrying either scrambled shRNA (left column) or shCdk5  
1224 (right column). CDK5 is significantly down regulated in brain infected with AAVs expressing  
1225 shCdk5. Values in the bar diagram represent the mean $\pm$ SEM of CDK5 signal relative to the  
1226 signal in the scramble control, t-test, n = 3, \*\*\*p<0.001. Scale bar: 60  $\mu$ m (C) Representative  
1227 brain sections of normal mice containing the SCN region after injection of AAVs carrying  
1228 either scrambled shRNA or shCdk5. GFP was used as a marker to illustrate the infected region  
1229 including the SCN. As control a SCN section of *Per2<sup>Brdm1</sup>* mouse is shown that was not infected  
1230 with AAV. The PER2 signal (red) is down regulated in the SCN region of AAV shCdk5  
1231 injected brain as it was absent in the *Per2<sup>Brdm1</sup>* SCN. Scale bar 500  $\mu$ m. (D) Higher  
1232 magnification of representative sections of the SCN after AAVs carrying either scrambled  
1233 shRNA (left column) or shCdk5 (middle column). CDK5 is significantly down regulated in  
1234 brain infected with AAVs expressing shCdk5. The right column shows a section of *Per2<sup>Brdm1</sup>*  
1235 mouse not infected with AAVs. Values in the bar diagram represent the mean $\pm$ SEM of PER2  
1236 signal relative to the signal in the scramble control, t-test, n = 3, \*\*p<0.01. Scale bar: 60  $\mu$ m.

1237

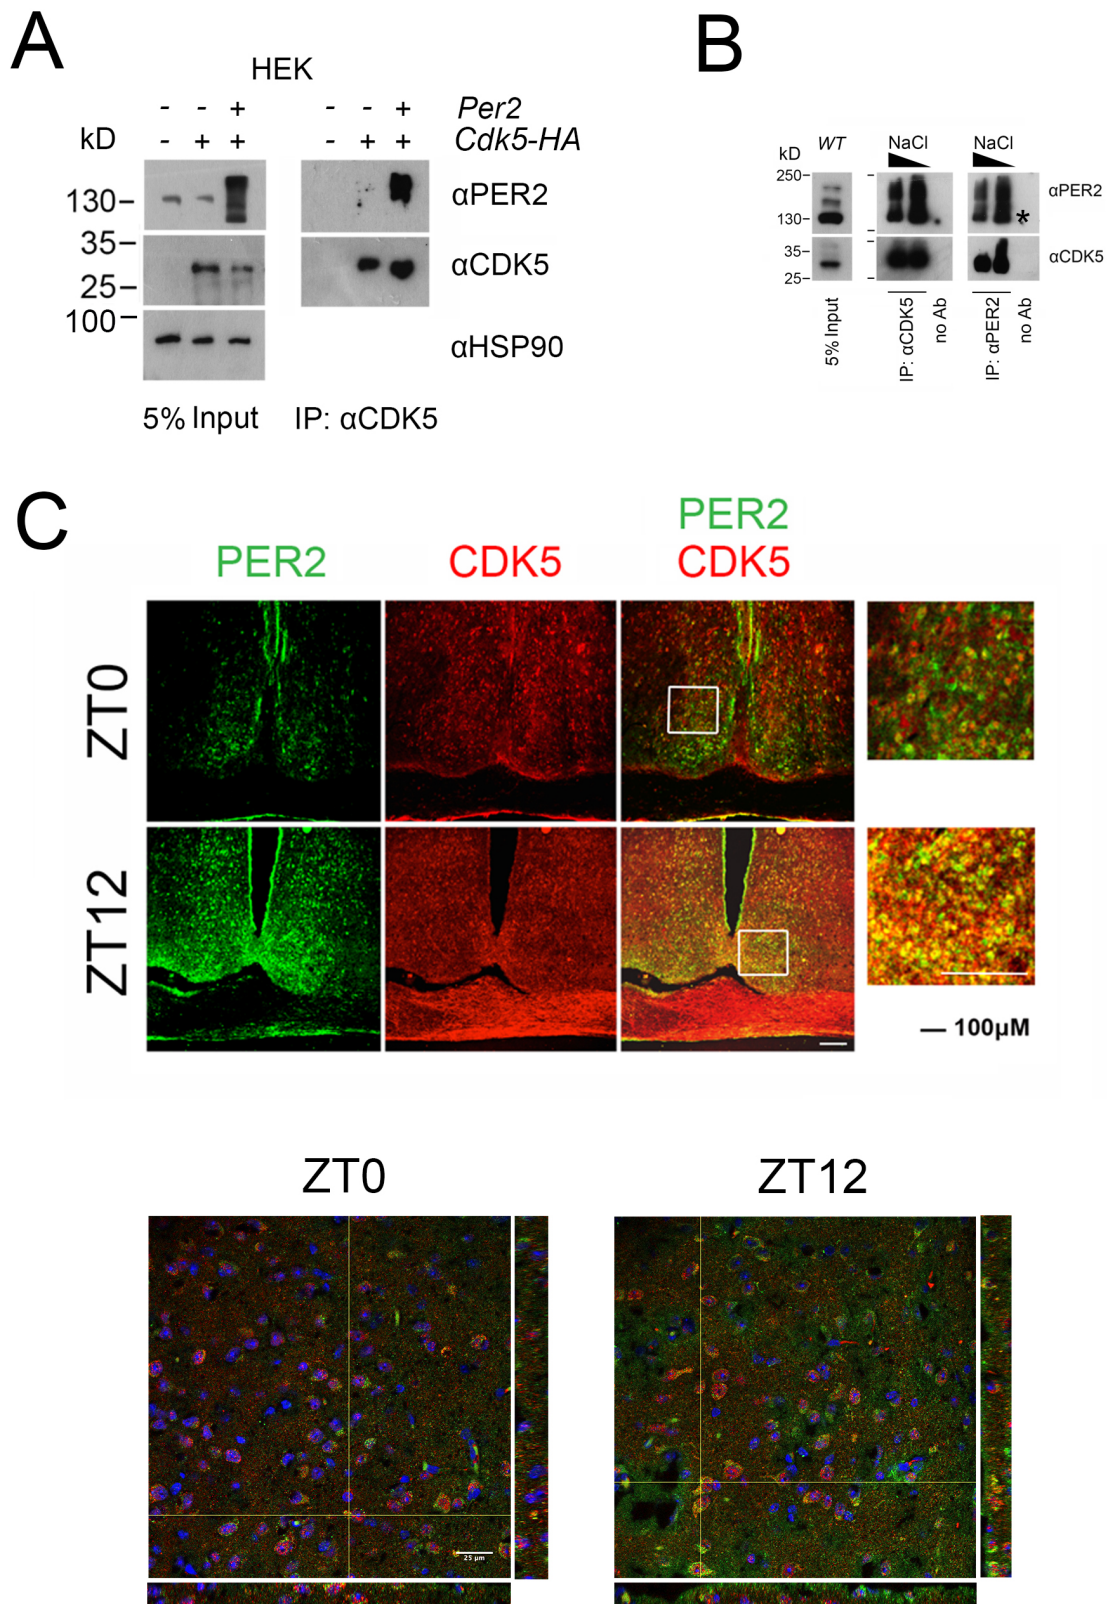

Fig. S4

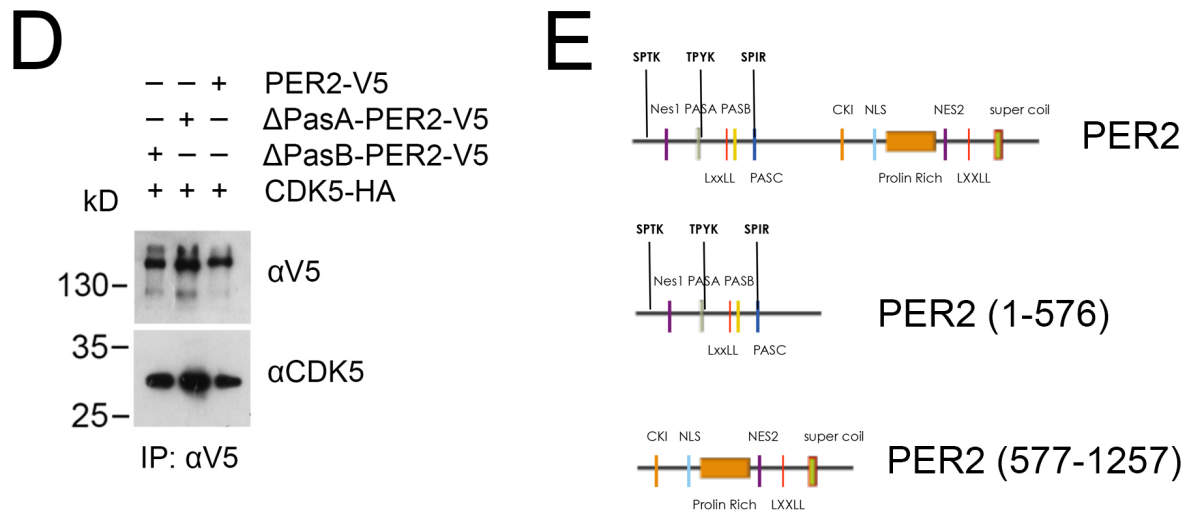

Fig. S4

1239

1240

1241

1242

1243



1244 **Figure S4 Dynamics of the interaction between CDK5 and PER2.**

1245 (A) Overexpression of PER2 and CDK5 in HEK 293 cells and subsequent immunoprecipitation  
1246 (IP) using an anti-CDK5 antibody. The left panel shows the input and the right panel co-  
1247 precipitation of PER2 with immunoprecipitated CDK5 when both were overexpressed. (B)  
1248 Immunoprecipitation (IP) of PER2 and CDK5 from total mouse brain extract collected at ZT12.  
1249 Left panel shows the input. The middle and right panels depict co-immunoprecipitation of  
1250 PER2 and CDK5 at two different NaCl concentrations using either anti-CDK5 antibody or anti-  
1251 PER2 antibody for precipitation. \* in the blot indicates unspecific signal. (C) Temporal profile  
1252 of the PER2-CDK5 interaction observed by immunofluorescence at ZT0 and ZT12. SCN  
1253 slices, obtained from mice perfused at ZT 0 and ZT 12, were stained with anti-PER2 antibody  
1254 (green) and anti-CDK5 antibody (red). Co-localization of the two proteins results in a yellow  
1255 color, which was observed only at ZT12. Scale bar: 200  $\mu$ m. The two panels below show a  
1256 higher magnification depicting single cells in the SCN. The Z-stacks right and below each  
1257 image show that PER2 and CDK5 mainly co-localize at ZT12. Scale bar: 25  $\mu$ m. (D) NIH 3T3  
1258 cells were transfected with vectors carrying PER2-V5,  $\Delta$ PasA-PER2-V5, or  $\Delta$ PasB-PER2-V5,  
1259 and subsequently, immunoprecipitation (IP) using an anti-CDK5 antibody was performed. The  
1260 results showed that CDK5 was able to interact with all forms of PER2. None of the PAS  
1261 domains of PER2 seems to be involved in the interaction with CDK5. (E) Scheme of PER2  
1262 fragments used for the pull-down assay.



1264 **Figure S5 Production and validation of the antibody against the phosphorylated serine**  
1265 **394 on PER2.**

1266 (A) Scheme of PER2 fragments used for the *in vitro* kinase assay. The fragment 1-576 covers  
1267 the sites that might be phosphorylated by CDK5 on the basis of the conserved consensus  
1268 (S/T)PX(K/H/R). (B) An *in vitro* kinase assay performed in presence of recombinant  
1269 CDK5/p35 and using as substrate the GST-PER2 1-576. (C) The reactions were treated either  
1270 with LiCl (inhibitor of GSK3 $\beta$  kinase activity) or roscovitine (inhibitor of CDK5 kinase  
1271 activity) in order to highlight the specificity of the PER2 phosphorylation mediated by CDK5.  
1272 (D) Different antisera against the PER2 peptide sequence FDY {pSer}PIRFRTRNGEC were  
1273 tested by *in vitro kinase* assay using recombinant GST-PER2 1-576 (in presence or absence of  
1274 CDK5/p35) followed by WB. Even if at this stage it was necessary to choose an antiserum that  
1275 recognized the PER2 peptide regardless of its phosphorylation status, the antiserum 1 was able  
1276 to discriminate the two forms and was therefore used for the following amplifications. (E)  
1277 Different hybridomas producing antibodies against the PER2 peptide sequence  
1278 FDY {pSer}PIRFRTRNGEC were tested by *in vitro kinase* assay using recombinant GST  
1279 PER2 1-576 (in presence or absence of CDK5/p35) followed by WB. From 16 different clones,  
1280 the positive ones are shown. The clone 10E12 was used to produce the final antibody. (F) Total  
1281 protein extracts were obtained from wild-type, *Per2<sup>Brdm1</sup>* and *Per2<sup>-/-</sup>* mouse brains at ZT12.  
1282 Western blot was performed in order to validate the specificity of the antibody against the  
1283 phosphorylated serine 394 on PER2. Only samples obtained from WT tissues showed the  
1284 phosphorylated form of the protein. Antibody against total PER2 was used as control, which,  
1285 positively detected the protein only in extracts obtained from wild-type mice.

CDK5 regulates the circadian clock

Brenna et al.

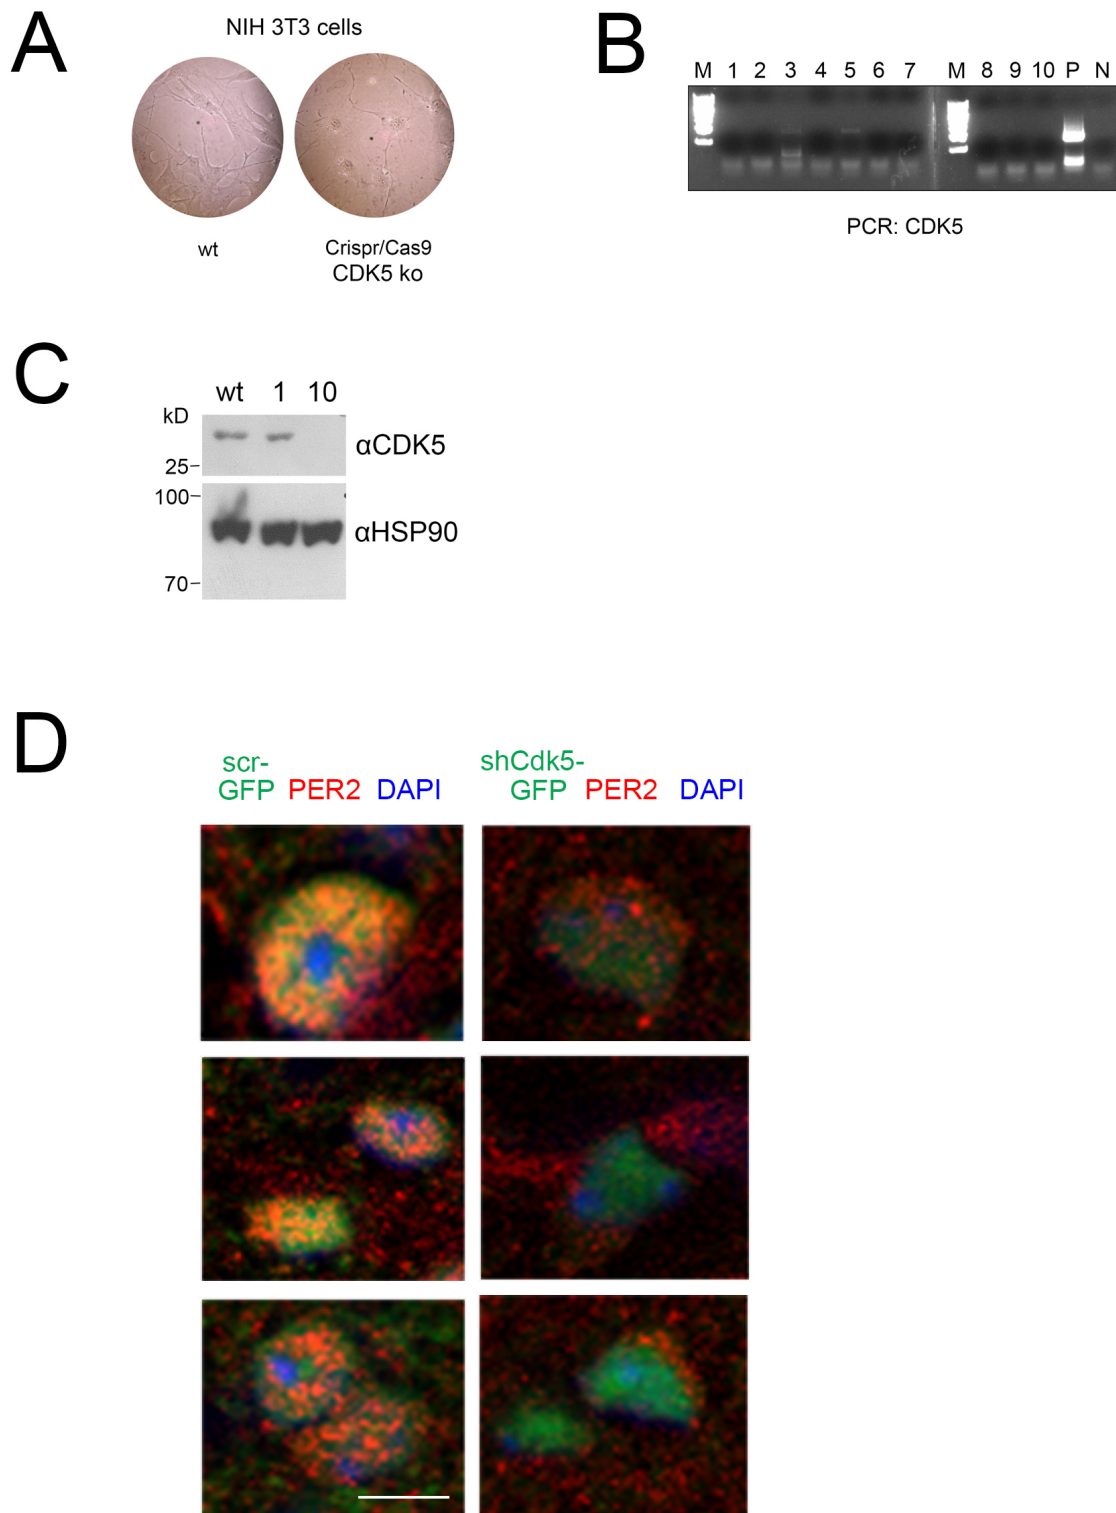

Fig. S6

1287 **Figure S6 Production and validation of CRISPR/Cas9 *Cdk5*-deficient cell lines.**

1288 (A) NIH 3T3 and CRISPR/Cas9 *Cdk5*-deficient cells were photographed using a bright light  
1289 microscope (100 x). A clear difference in shape and thickness between the two cell lines could  
1290 be observed. CRISPR/Cas9 *Cdk5* cells appeared rather stressed and not to be dividing well.  
1291 (B) PCR to detect the mutation of the genomic *Cdk5* DNA sequence was performed on different  
1292 putative knock-out clones. Among these, clones 3 and 5 showed the *Cdk5* PCR product,  
1293 demonstrating that showed they were false positive for knocking out the gene. A positive  
1294 control (WT genomic DNA) and negative control (water as template) were used. (C) Total  
1295 protein extracts were obtained from clone 1, 10 and WT NIH 3T3. Western blot was performed  
1296 in order to verify which clone no longer expressed CDK5. Clone number 10 was confirmed to  
1297 be a positive CRISPR/Cas9 *Cdk5* knock-out clone. (D) Additional examples of  
1298 immunofluorescence of PER2 (red) at ZT12 in mouse SCN sections after infection with AAV  
1299 (green) expressing scrambled shRNA (left column of panels), or shCdk5 (right column of  
1300 panels). Nuclei are visualized by DAPI staining (blue). PER2 can only be observed in the  
1301 nucleus in presence but not in absence of CDK5. Scale bar = 2  $\mu$ m.

CDK5 regulates the circadian clock

Brenna et al.

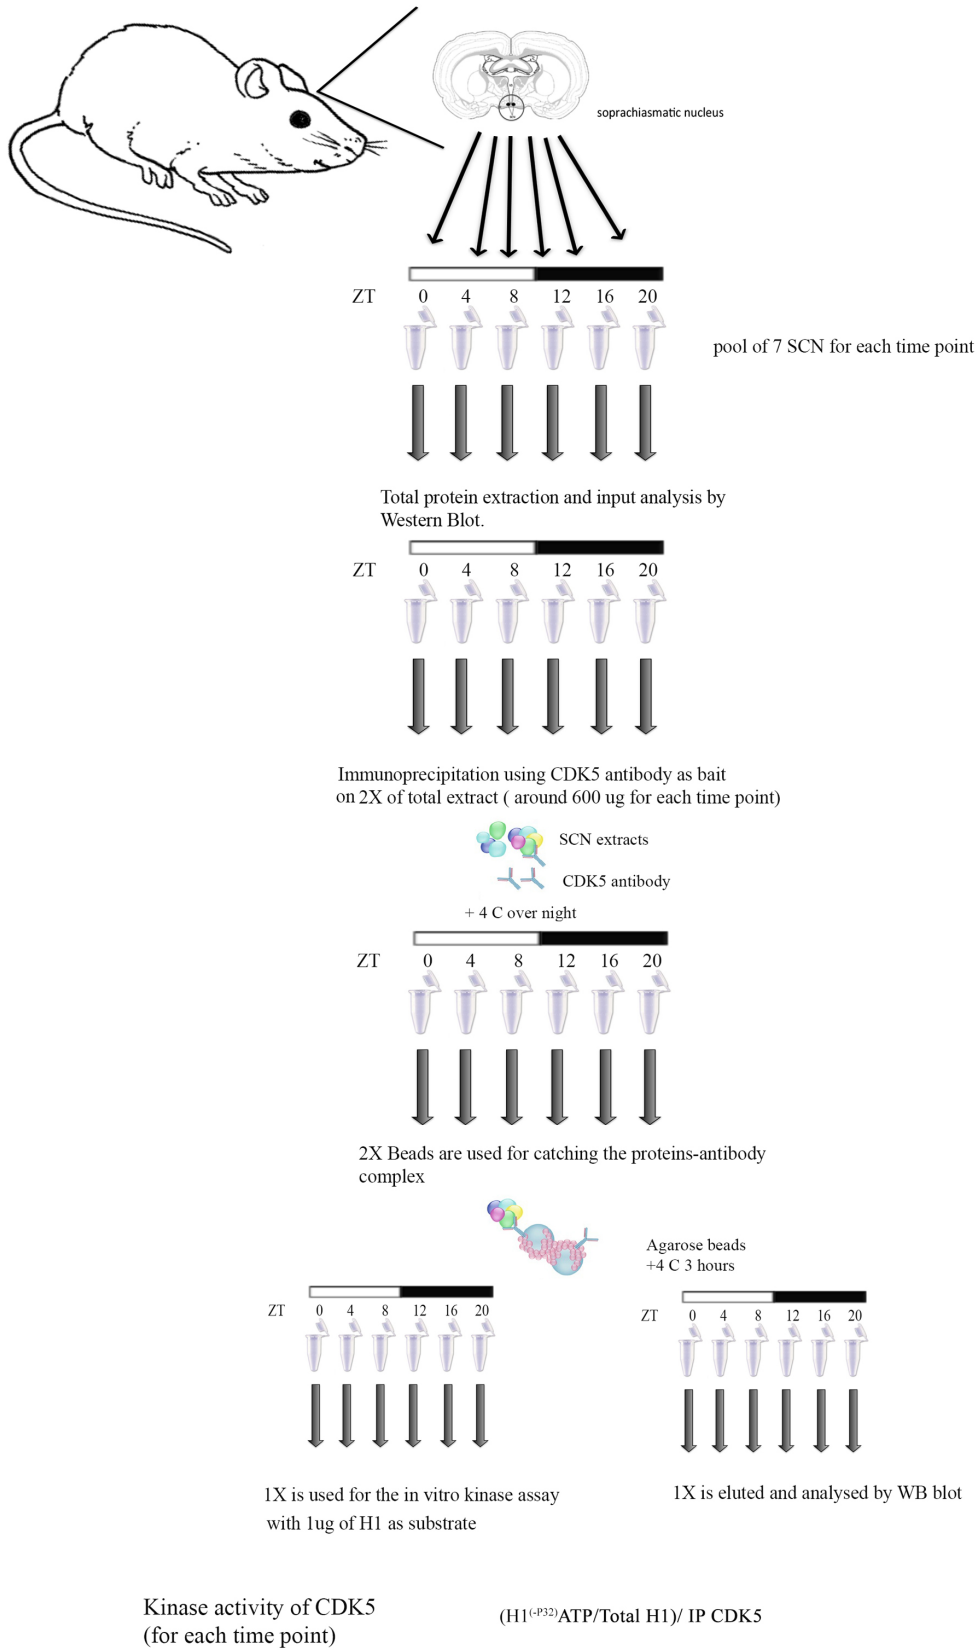

Fig. S7

1303 **Figure S7: Diurnal CDK5-dependent kinase activity in the SCN.**

1304 Workflow of the *in vitro* kinase assay performed using immunoprecipitated CDK5 from SCN  
1305 protein extracts is schematized here. Seven mice were sacrificed, SCN tissues were isolated and  
1306 pooled together every 4 hours starting from ZT 0 (lights on) until ZT20 (ZT12 lights off). Total  
1307 protein was obtained from each pool of tissues, the quality of the extracts was checked by WB,  
1308 and subsequently CDK5 was immunoprecipitated at each time point. Agarose beads detained the  
1309 immunoprecipitation and one half of the precipitate was used for an *in vitro* kinase assay using as  
1310 substrate commercial histone H1 as substrate. The other half was analyzed by WB in order to  
1311 quantify the amount of protein immunoprecipitated, which was used for the kinase assay. Kinase  
1312 activity around the clock was quantified using the following formula: ( $^{32}\text{P}$ -H1/total H1)/amount of  
1313 immunoprecipitated CDK5.

1314

1315

1316

1317

1318 **Supplemental Table**

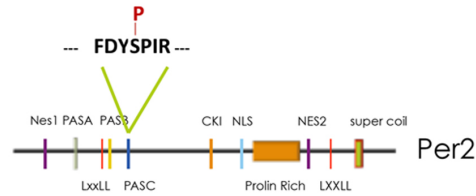

**Position Localizatio**

| PER2       | n prob   | PEP      | Score        | AA       | Phospho (STY) Probabilities                             |
|------------|----------|----------|--------------|----------|---------------------------------------------------------|
| 544        | 0.799437 | 0.005214 | 64.71        | S        | EASVAEMQS(0.799)S(0.2)PPAQVK                            |
| 545        | 0.971174 | 0        | 269.9        | S        | EASVAEMQS(0.029)S(0.971)PPAQVK                          |
| <b>394</b> | <b>1</b> | <b>0</b> | <b>254.8</b> | <b>S</b> | <b>ILOAGGQPFDY(1)PIR</b>                                |
| 68         | 0.775091 | 1.79E-22 | 107.8        | S        | MLVES(0.775)S(0.17)NT(0.059)HPS(0.996)PDDAFR            |
| 69         | 0.997904 | 0        | 277.3        | S        | MLVES(0.001)S(0.998)NT(0.001)HPSPDDAFR                  |
| 74         | 0.996316 | 1.79E-22 | 107.8        | S        | MLVES(0.775)S(0.17)NT(0.059)HPS(0.996)PDDAFR            |
| 13         | 0.437023 | 8.05E-19 | 141.6        | S        | NGYVDFSPS(0.074)PT(0.392)S(0.437)PT(0.097)K             |
| 241        | 0.405232 | 2.34E-14 | 83.42        | T        | FVEFLAPHDVS(0.005)VFHS(0.094)Y(0.079)T(0.405)T(0.405)PY |
| 242        | 0.405232 | 2.34E-14 | 83.42        | T        | FVEFLAPHDVS(0.005)VFHS(0.094)Y(0.079)T(0.405)T(0.405)PY |
| 332        | 0.826097 | 2.85E-24 | 134.5        | T        | IFT(0.826)T(0.147)T(0.026)HT(0.001)PNCLFQAVDER          |
| 333        | 0.25     | 0.000872 | 49.54        | T        | IFT(0.25)T(0.25)T(0.25)HT(0.25)PNCLFQAVDER              |
| 334        | 0.25     | 0.000872 | 49.54        | T        | IFT(0.25)T(0.25)T(0.25)HT(0.25)PNCLFQAVDER              |
| 336        | 0.25     | 0.000872 | 49.54        | T        | IFT(0.25)T(0.25)T(0.25)HT(0.25)PNCLFQAVDER              |
| 71         | 0.545837 | 1.88E-24 | 118.4        | T        | MLVES(0.11)S(0.424)NT(0.546)HPS(0.921)PDDAFR            |
| 290        | 0.999951 | 0.005907 | 57.86        | T        | MT(1)PYLVK                                              |

Table S1



1320 **Table S1: Phosphorylation sites of GST-Per2 (1-576) detected by mass spectrometry.**

1321 The serine at position 394 stands out as the best localized phosphorylation site within a CDK5  
1322 consensus motif with a high peptide score (highlighted in yellow). The colored diagram shows  
1323 the structural elements of PER2 (1-576) with the S394 phosphorylation site indicated. PEP:  
1324 posterior error probability; Loc. Prob.; localization probability.

1325

CDK5 regulates the circadian clock

Brenna et al.

| Construct             | NCBI      | Primers                              | Primers sequence                                                                | Comment                                                                                                                                             |
|-----------------------|-----------|--------------------------------------|---------------------------------------------------------------------------------|-----------------------------------------------------------------------------------------------------------------------------------------------------|
| pSCT1                 |           |                                      |                                                                                 | Langmesser et al 2008.                                                                                                                              |
| pSCT1mPer2            | NM_011066 |                                      |                                                                                 | Langmesser et al 2008                                                                                                                               |
| pSCT1mPer2 S-G        | NM_011066 | Per2 S-G FW<br>Per2 S-G RW           | 5'-gacagcctttcgattatggtcccattcgcac-3'<br>5'gtgcggaatcgaatgggaccataatcga gtc-3'  | Mutation of aa serine 394 into glicine                                                                                                              |
| pSCT1mPer2-V5         | NM_011066 |                                      |                                                                                 | Schmutz et al., 2010                                                                                                                                |
| pSCT1 ΔPasA mPer2 -V5 | NM_011066 |                                      |                                                                                 |                                                                                                                                                     |
| pSCT1 ΔPasB mPer2 -V5 | NM_011066 |                                      |                                                                                 |                                                                                                                                                     |
| Gex-4T PER2 1-576     | NM_011066 | Per2 1-576 FW<br>Per2 1-576 RW       | 5'-ggctcgacatgaatggatacgtgga-3'<br>5'-gctcgagataggctagtctc-3'                   | Per2 fragment pcr product was subcloned in TOPO vector and subsequently moved into Gex-4T and inserted in the MCS using Sall/XhoI restriction sites |
| Gex-4T PER2 577-1256  | NM_011066 | Per2 577-1256 FW<br>Per2 577-1256 RW | 5'-ggctcgacaagaaccagcctcctg-3'<br>3'-gctcgagcgtctgggcctctat-3'                  | Per2 fragment pcr product was subcloned in TOPO vector and subsequently moved into Gex-4T and inserted in the MCS using Sall/XhoI restriction sites |
| Gex4t Per2 1-576 S-G  | NM_011066 | Per2 S-G FW<br>Per2 S-G RW           | 5'-gacagcctttcgattatggtcccattcgcac-3'<br>5'gtgcggaatcgaatgggaccataatcga gtc-3'  | Mutation of aa serine 394 into glicine                                                                                                              |
| Gex4t Per2 1-576 S-D  | NM_011066 | Per2 S-G FW<br>Per2 S-G RW           | 5'-gacagcctttcgattatgatccca ttcgcac-3'<br>5'gtgcggaatcgaatgggatcataat cgagtc-3' | Mutation of aa serine 394 into aspartic acid                                                                                                        |
| pSCT1 CDK5-HA         | NM_007668 | Cdk5 (I) FW<br>Cdk5 (I) RW           | 5'-gccaccggtatgcagaaatacagag-3'<br>5'-gccggatcctgggggacaga-3'                   | CDK5 pcr product was subcloned in TOPO vector and subsequently moved into PSCt-1 HA and inserted in the MCS using AgeI/BamHI restriction sites      |
| pSCT1 CDK5-HIS        | NM_007668 | CDK5 HIS FW<br>CDK5 HIS RW           | 5'-gggcatatgcagaaatacagacaac-3'<br>5'-gggatccctatgggggacagaa-3'                 | CDK5 pcr product was subcloned in TOPO vector and subsequently moved into pet-15b and inserted in the MCS using NdeI/ BamHI restriction sites       |

1326

1327 **Table S2: Plasmids**
